# Supplementary material for: Association of triglyceride-glucose index with the risk of prostate cancer: a retrospective study
Source: PeerJ. 2023 Nov 7;11:e16313. doi: 10.7717/peerj.16313 (PMC10637243; doi:10.7717/peerj.16313)
Supplement: Supplemental Information 3 [file peerj-11-16313-s003.xlsx]

## Sheet: Sheet1
Serial number	Education level	Marital Status	Age	Ethnicity	Ethnic grouping	Pathology grouping	Smoking group	Drinking grouping	BMI	Systolic pressure	Diastolic blood pressure	Hypertension subgroup	Alkaline phosphatase	Blood sugar	Hyperglycemia grouping	TG	TyG	LDL	CA	K	TC
1	College	Married	82	Han Chinese	0	1	0	0	20	156	77	1	91.34	5.48	0	1.33	8.66764	1.92	2.24	4.06	3.31
2	Undergraduate	Married	64	Han Chinese	0	1	0	0	26	155	79	1	60.52	8.8	1	0.91	8.7618	2.1	2.09	2.94	3.56
3	College	Married	76	Han Chinese	0	1	0	0	21	124	80	0	63.31	4.77	0	0.22	6.72958	1.8	2.43	3.63	3.65
4	High School	Married	83	Han Chinese	0	1	0	0	21	130	80	0	106.79	7.34	1	0.92	8.59131	1.67	2.3	3.45	2.86
5	Junior High School	Married	58	Han Chinese	0	1	0	0	22	85	51	0	73.72	5.52	0	1.7	8.92036	1.99	2.33	3.28	3.66
6	Junior High School	Married	66	Uighur	1	1	0	0	24	150	76	1	130.18	4.17	0	3.1	9.24067	2.32	2.5	4.16	4.86
7	Secondary School	Married	66	Han Chinese	0	1	1	1	25	140	80	1	62.73	5.57	0	1.45	8.77032	2.62	2.3	3.68	4.3
8	Secondary School	Married	79	Han Chinese	0	1	0	0	25	136	78	0	66.13	4.79	0	0.94	8.18601	1.87	2.19	4.15	3.53
9	College	Married	69	Han Chinese	0	1	0	0	28	113	78	0	86.91	5.61	0	1.19	8.57986	1.25	2.29	3.86	2.77
10	High School	Married	80	Uighur	1	1	0	0	22	115	82	0	86.3	4.83	0	1.08	8.33316	1.72	2.37	3.48	2.9
11	High School	Married	69	Uighur	1	1	0	0	32	124	76	0	101.21	6.41	0	2.37	9.40211	2.41	2.38	3.42	4.58
12	High School	Married	81	Han Chinese	0	1	0	0	23	129	65	0	67.54	3.68	0	0.95	7.93298	2.51	2.19	3.74	3.67
13	High School	Married	65	Mongolian	1	1	0	0	29	160	100	1	106.07	3.82	0	0.78	7.77315	1.77	2.26	3.35	2.76
14	Illiterate	Married	65	Uighur	1	1	0	0	27	107	76	0	97.64	5.65	0	0.85	8.25049	1.74	2.23	4.2	2.86
15	Primary School	Married	82	Han Chinese	0	1	0	0	26	131	68	0	67.38	1.81	0	0.52	6.62076	1.39	2.19	3.39	2.42
16	Undergraduate	Married	50	Uighur	1	1	1	0	25	110	86	0	72.12	9.58	1	1.71	9.47753	2.15	2.3	4.03	3.83
17	Undergraduate	Married	75	Han Chinese	0	1	0	0	25	140	81	1	79.8	6.21	0	1.44	8.87216	3.17	2.28	3.86	4.67
18	High School	Married	64	Han Chinese	0	1	0	0	28	140	92	1	86.83	10.52	1	2.14	9.79544	3.46	2.34	3.5	5.61
19	Primary School	Married	72	Han Chinese	0	1	0	0	24	132	69	0	50	10.24	1	0.87	8.8684	3.3	2.33	4.26	5
20	College	Married	63	Han Chinese	0	1	0	0	24	145	87	1	60.74	5.19	0	1.81	8.92142	3.97	2.28	3.67	5.99
21	Junior High School	Married	58	Han Chinese	0	1	0	0	24	125	77	0	295.9	11.54	1	1.53	9.55244	2.04	2.28	3.88	3.6
22	Primary School	bereaved spouse	84	Han Chinese	0	1	1	0	24	110	74	0	169.4	9.14	1	1.36	9.2015	2.71	1.91	3.37	3.23
23	Graduate Students	Married	72	Han Chinese	0	1	0	0	24	145	77	1	73.61	18.58	1	2.1	10.3454	0.95	2.2	4.21	2.34
24	Undergraduate	Unmarried	28	Han Chinese	0	1	0	0	22	118	83	0	65.75	5.01	0	0.92	8.20941	3.14	2.29	3.41	4.65
25	Secondary School	Married	71	Uighur	1	1	0	0	30	137	83	0	69.32	6.23	0	1.12	8.62406	1.52	2.27	3.1	2.96
26	College	Married	69	Han Chinese	0	1	0	0	22	112	75	0	50.19	4.61	0	0.58	7.66486	1.57	2.17	3.3	2.95
27	High School	bereaved spouse	61	Han Chinese	0	1	0	0	28	119	83	0	84.23	7.03	1	3.04	9.7434	3.51	2.45	3.35	5.65
28	High School	Married	68	Han Chinese	0	1	0	0	25	113	69	0	72.33	6.1	0	2.2	9.2781	3.06	2.27	3.84	5.03
29	College	Married	73	Han Chinese	0	1	0	0	22	133	55	0	61.21	5.43	0	2.07	9.10084	2.76	2.08	3.35	4.38
30	Junior High School	Married	78	Han Chinese	0	1	1	0	20	132	78	0	52.13	4.23	0	0.95	8.07227	2.27	2.38	3.94	3.82
31	College	Married	68	Uighur	1	1	0	0	30	125	76	0	115.14	7.75	1	1.52	9.14776	3.44	2.26	3.73	5.33
32	College	Married	53	Han Chinese	0	1	1	0	20	124	77	0	75.93	7.77	1	3.15	9.87903	2.47	2.33	3.66	4.49
33	Junior High School	Married	66	Uighur	1	1	1	1	33	151	88	1	131.09	7.99	1	6.1	10.5678	2.91	2.31	3.31	4.99
34	Junior High School	Married	84	Han Chinese	0	1	0	0	21	119	53	0	61.37	8.36	1	0.95	8.75352	2.31	2.22	4.18	3.99
35	Secondary School	Married	51	Uighur	1	1	0	0	28	140	80	1	58.31	5.63	0	4.74	9.9655	2.49	2.22	3.6	4.65
36	Junior High School	Married	67	Han Chinese	0	1	0	0	21	127	79	0	39.68	7.88	1	1.78	9.3223	3.59	2.36	3.71	5.8
37	Primary School	Married	73	Uighur	1	1	1	1	26	127	80	0	99.9	12.79	1	2.23	10.032	2.66	2.15	3.65	4.12
38	Illiterate	Married	66	Han Chinese	0	1	0	0	27	136	94	1	53	5.66	0	3.22	9.58416	1.65	2.14	3.31	3.31
39	Secondary School	Married	64	Manchu	1	1	1	0	27	113	81	0	71.89	5.7	0	1.68	8.94062	1.4	2.29	3.41	2.94
40	Junior High School	Married	61	Kazakh people	1	1	0	0	20	122	74	0	1094.77	4.18	0	0.97	8.08121	1.85	2.06	3.47	2.95
41	Junior High School	Married	57	Han Chinese	0	1	1	1	27	130	90	1	47.1	8.46	1	1.66	9.32352	2.39	2.26	3.21	4.6
42	Primary School	Married	56	Han Chinese	0	1	0	0	24	132	78	0	51.11	4.1	0	1.58	8.54977	1.78	2.23	2.91	3.26
43	Junior High School	Married	72	Han Chinese	0	1	0	0	29	118	69	0	54.47	5.37	0	1.11	8.46654	3.68	2.36	3.99	4.91
44	Junior High School	Married	79	Han Chinese	0	1	0	0	23	142	85	1	59.66	6.2	0	1.94	9.16859	2.28	2.35	3.94	3.83
45	Primary School	Married	74	Hui	1	1	0	0	17	120	81	0	393.71	9.76	1	0.66	8.54413	1.61	2.2	2.52	5.78
46	Junior High School	Married	84	Han Chinese	0	1	1	1	21	134	86	0	52.32	7.1	1	3.12	9.77928	1.45	2.2	3.73	3.84
47	Undergraduate	Married	75	Han Chinese	0	1	0	0	22	102	74	0	81.29	4.13	0	2.93	9.17464	1.42	2.39	3.94	3.47
48	Secondary School	Married	83	Han Chinese	0	1	0	0	19	134	76	0	67.51	4.35	0	0.89	8.035	1.96	2.43	3.23	3.66
49	High School	Married	70	Hui	1	1	0	0	26	111	76	0	40.98	9	1	0.52	8.22465	1.5	2.3	3.7	2.85
50	High School	Married	72	Han Chinese	0	1	1	0	26	118	80	0	52.86	9.28	1	1.22	9.10807	2.23	2.15	3.09	3.84
51	High School	Married	67	Han Chinese	0	1	0	0	25	132	76	0	50	7.39	1	1.76	9.2468	0.88	2.4	4.52	2.5
52	Junior High School	Married	68	Uighur	1	1	0	0	31	122	70	0	100.57	5.24	0	1.33	8.62286	2.29	2.51	4.14	3.64
53	Secondary School	Married	81	Han Chinese	0	1	0	0	22	145	78	1	87.99	9.5	1	2.89	9.9939	1.31	2.12	3.76	3.77
54	Junior High School	Married	54	Han Chinese	0	1	1	1	27	100	65	0	59.88	6.71	0	4.29	10.0412	0.28	2.4	3.64	3.02
55	Primary School	Married	85	Han Chinese	0	1	0	0	25	132	77	0	130.4	6.1	0	1.47	8.87491	2.61	2.25	3.71	4.18
56	Primary School	Married	75	Uighur	1	1	0	0	19	130	82	0	135.78	6.31	0	1.82	9.12233	2.16	2.22	3.67	4.47
57	Primary School	Married	68	Han Chinese	0	1	0	0	25	121	80	0	61.2	10.7	1	1.52	9.47031	2.93	2.43	3.98	4.69
58	High School	Married	78	Han Chinese	0	1	0	0	22	149	86	1	70.9	5.1	0	1	8.3106	2.35	2.29	4.12	4.3
59	High School	Married	57	Uighur	1	1	0	0	39	137	70	0	64.9	4.3	0	2.11	8.88666	2.59	2.2	3.5	4.7
60	Secondary School	Married	55	Uighur	1	1	1	1	19	111	61	0	626.4	4.8	0	1.9	8.89183	3.72	1.9	4.1	5
61	College	Married	81	Han Chinese	0	1	1	0	19	120	80	0	976	5.4	0	1.1	8.46307	2.7	2.2	4.1	3.68
62	Junior High School	Married	85	Han Chinese	0	1	1	0	20	120	80	0	71.33	7.28	1	1.45	9.03805	2.48	2.45	4.25	4.02
63	Primary School	Married	79	Russian ethnicity	1	1	0	0	20	142	77	1	150.93	5.3	0	1.17	8.50607	2.34	2.16	6.01	3.87
64	Junior High School	Married	81	Han Chinese	0	1	0	0	18	130	83	0	101.02	5.62	0	0.92	8.32431	2.76	2.36	3.82	4.47
65	Junior High School	Married	81	Mongolian	1	1	0	0	24	120	80	0	59.8	6.7	0	1.54	9.01525	2.63	2.13	4.43	4.24
66	Undergraduate	Married	72	Xibo ethnic group	1	1	0	0	22	120	80	0	90.31	7.25	1	2.94	9.74077	1.55	2.28	4.42	3.78
67	Undergraduate	Married	78	Han Chinese	0	1	1	0	25	128	82	0	101	6.88	0	1	8.60998	2.23	2.26	3.68	3.73
68	Primary School	Married	67	Han Chinese	0	1	1	0	24	125	67	0	73	6.8	0	1.9	9.24013	1.78	2.1	3.7	3.8
69	Primary School	Married	77	Han Chinese	0	1	1	0	25	127	76	0	72	8.3	1	1.86	9.41819	1.77	2.49	3.3	3.3
70	Undergraduate	Married	88	Han Chinese	0	1	1	0	22	132	76	0	53.1	6.89	0	1.64	9.10612	2.79	2.38	4.28	3.98
71	High School	Married	56	Han Chinese	0	1	1	1	22	137	87	0	49.88	7.22	1	0.93	8.58564	2.36	2.03	3.43	3.62
72	College	Married	67	Han Chinese	0	1	0	0	20	120	80	0	61.48	5.89	0	4.03	9.84838	2.42	2.38	3.68	4.44
73	Primary School	Married	66	Han Chinese	0	1	1	1	24	130	70	0	328.4	5.54	0	1.33	8.67853	2.82	2.27	3.6	4.47
74	High School	Married	72	Uighur	1	1	0	0	20	120	80	0	268.55	3.88	0	1.21	8.22781	2.18	2.15	3.81	3.18
75	College	Married	63	Han Chinese	0	1	0	0	22	105	55	0	680	4.64	0	1.02	8.23587	2.13	2.05	3.28	3.28
76	Illiterate	Married	78	Han Chinese	0	1	0	0	20	120	80	0	170	5.36	0	0.96	8.3195	2.22	2.21	4.12	4.11
77	College	Married	66	Han Chinese	0	1	0	0	29	153	86	1	55.03	6.7	0	0.72	8.25496	0.54	2.22	3.45	2
78	Primary School	Married	71	Kazakh people	1	1	0	0	19	142	92	1	273.05	5.4	0	2.17	9.14248	2.28	2.19	4.2	4.63
79	High School	Married	62	Han Chinese	0	1	0	0	20	122	66	0	78.72	6.2	0	2.07	9.23345	3.16	2.26	3.94	4.95
80	College	Married	72	Han Chinese	0	1	1	0	25	131	77	0	68.41	5.7	0	2.96	9.50701	1.88	2.19	3.41	3.68
81	Primary School	Married	79	Han Chinese	0	1	0	0	21	114	69	0	50.27	6.1	0	0.94	8.42777	1.45	2.39	3.73	3.7
82	Primary School	Married	78	Kazakh people	1	1	0	0	26	136	67	0	71.62	5.8	0	2.42	9.32298	2.05	2.27	3.65	3.76
83	High School	Married	72	Han Chinese	0	1	0	0	20	123	78	0	40.95	10	1	5.01	10.5954	2.2	3.33	3.94	4.18
84	Illiterate	Married	86	Han Chinese	0	1	0	1	25	149	85	1	69.96	6.4	0	2.66	9.51598	2.65	2.31	3.99	4.57
85	Junior High School	Married	83	Han Chinese	0	1	0	0	20	150	90	1	60.96	5.8	0	0.81	8.22849	2.5	2.48	4.07	17.42
86	Primary School	Married	70	Han Chinese	0	1	0	0	24	121	77	0	63.13	5.6	0	1.28	8.65098	3.08	2.33	4.5	5.29
87	High School	Married	64	Han Chinese	0	1	1	0	20	124	69	0	52.98	10.3	1	1.26	9.24461	2.02	2.23	3.77	3.57
88	High School	Married	77	Han Chinese	0	1	0	0	20	125	85	0	52.26	5.97	0	1.03	8.49766	3.32	2.43	3.75	4.77
89	Junior High School	Married	63	Hui	1	1	1	0	29	124	74	0	76.89	9.6	1	1.1	9.03843	1.49	2.15	3.35	2.81
90	Undergraduate	Married	82	Kazakh people	1	1	0	0	20	120	80	0	54.92	6.06	0	1.84	9.09283	2.37	2.18	3.99	4.26
91	High School	Married	53	Han Chinese	0	1	0	0	27	126	84	0	54.11	4.75	0	1.94	8.90219	2.53	2.27	3.32	4.3
92	Junior High School	Married	66	Han Chinese	0	1	1	1	26	120	80	0	84	18.82	1	2.89	10.6775	1.52	2.29	4.27	3.11
93	High School	Married	83	Han Chinese	0	1	0	0	28	120	80	0	43.56	6	0	3.3	9.66704	3.21	2.27	3.71	5.23
94	High School	Married	75	Han Chinese	0	1	0	0	27	120	80	0	51.4	4.62	0	0.73	7.89704	1.93	2.16	4.55	3.01
95	Secondary School	Married	78	Han Chinese	0	1	0	0	22	120	80	0	66.26	8.05	1	3.22	9.93641	1.05	2.3	3.73	2.81
96	Junior High School	Married	76	Han Chinese	0	1	0	0	28	137	82	0	45.9	7.1	1	1.83	9.24577	2.15	2.4	3.19	4.54
97	Primary School	Married	63	Uighur	1	1	1	0	20	120	80	0	71.95	5.25	0	2.15	9.10505	2.97	2.32	3.02	4.73
98	Junior High School	Married	76	Han Chinese	0	1	0	0	25	147	84	1	74.51	6.29	0	1.77	9.0913	3.85	2.25	3.73	5.43
99	College	Married	71	Han Chinese	0	1	0	0	21	121	79	0	60.39	2.95	0	1.04	7.80238	3.05	2.33	3.14	4.88
100	Primary School	Married	67	Kazakh people	1	1	0	0	20	120	80	0	258	4.34	0	0.7	7.79256	1.92	2.17	4.03	9.76
101	College	Married	62	Han Chinese	0	1	0	0	23	120	80	0	63.83	5.85	0	0.64	8.00151	0.97	2.47	4	2.38
102	Junior High School	Married	75	Han Chinese	0	1	0	0	20	120	80	0	74.54	5.05	0	0.66	7.88523	1.97	2.22	3.4	3.55
103	College	Married	63	Uighur	1	1	0	0	20	122	80	0	75	5.36	0	1.32	8.63795	2.18	2.15	3.51	3.44
104	College	Married	51	Han Chinese	0	1	0	0	23	120	80	0	132	3.8	0	1.97	8.69439	2.21	2.25	3.4	4.29
105	Secondary School	Married	75	Han Chinese	0	1	0	0	26	120	80	0	97.18	9.96	1	2.3	9.81284	3.06	2.33	3.73	5.13
106	High School	Married	68	Han Chinese	0	1	0	0	29	121	67	0	59.48	6.27	0	2.81	9.55032	3.28	2.54	2.88	5.56
107	Primary School	bereaved spouse	81	Mongolian	1	1	0	0	25	138	77	0	57.83	5.7	0	0.84	8.24747	3.22	2	4.39	4.26
108	High School	Married	81	Han Chinese	0	1	0	0	22	120	80	0	40.61	5.1	0	1.07	8.37826	2.66	2.05	3.55	4.08
109	College	Married	54	Han Chinese	0	1	0	0	20	142	91	1	66.34	5.4	0	1.59	8.83149	2.93	2.31	3.34	4.75
110	College	Married	70	Han Chinese	0	1	1	0	25	168	94	1	64.81	6.5	0	2.42	9.43693	4.31	2.23	3.28	6.63
111	Primary School	Married	71	Han Chinese	0	1	0	0	22	134	76	0	83.38	5.8	0	2.8	9.46883	2.2	2.27	3.85	4.49
112	High School	Married	64	Uighur	1	1	0	0	21	126	66	0	124.78	5.1	0	1.46	8.68903	2.08	2.18	3.67	3.51
113	Undergraduate	Married	67	Uighur	1	1	1	0	24	135	80	0	55.27	6.9	0	1.97	9.29091	2.59	2.39	3.46	4.68
114	High School	Married	77	Han Chinese	0	1	0	0	24	120	80	0	58.71	6	0	2.7	9.46637	1.39	2.29	4.11	3.78
115	Secondary School	Married	83	Han Chinese	0	1	0	0	20	120	80	0	120.86	7.4	1	0.97	8.65238	2.82	2.26	3.13	4.33
116	College	Married	65	Han Chinese	0	1	0	0	20	126	60	0	62.31	6.2	0	1.06	8.56417	2.56	2.22	3.45	4.45
117	Primary School	Married	83	Han Chinese	0	1	0	0	25	160	80	1	32.52	7.7	1	0.6	8.21175	1.17	2.19	3.68	2.63
118	College	Married	69	Han Chinese	0	1	1	0	24	145	80	1	68.96	10	1	1.69	9.50867	4.25	2.15	3.09	5.88
119	Primary School	Married	64	Han Chinese	0	1	0	0	24	177	77	1	323	7	1	1.13	8.74948	3.48	2.39	4.09	4.8
120	Junior High School	Married	68	Han Chinese	0	1	0	0	23	127	60	0	56.99	5.7	0	1.08	8.49878	1.49	2.31	2.82	3.12
121	Secondary School	Married	64	Han Chinese	0	1	0	1	23	125	77	0	51.11	4.8	0	3.19	9.40999	2.05	2.27	3.71	4.43
122	College	Married	85	Han Chinese	0	1	0	0	21	120	80	0	292.52	6.2	0	1.56	8.95059	2.42	2.17	4.06	3.83
123	Secondary School	Married	59	Han Chinese	0	1	1	0	24	117	74	0	178.75	5.3	0	3.21	9.51533	2.38	2.39	3.39	4.22
124	High School	Married	84	Han Chinese	0	1	0	0	22	178	84	1	77.63	4.8	0	2.08	8.98234	2.66	2.18	3.3	4.75
125	Primary School	Married	66	Uighur	1	1	1	1	31	157	87	1	68.33	6.8	0	0.99	8.58823	2.29	2.2	3.91	3.75
126	High School	Married	78	Kazakh people	1	1	0	0	25	148	86	1	115.11	6.01	0	0.96	8.43396	1.79	2.27	3.97	3.25
127	Illiterate	Married	85	Han Chinese	0	1	0	0	23	97	60	0	62.6	4.71	0	1.75	8.79066	3.05	2.94	3.51	4.33
128	Undergraduate	Married	66	Uighur	1	1	0	0	29	125	70	0	81.61	17.21	1	1.92	10.1792	3.07	2.16	3.51	4.54
129	High School	Married	58	Han Chinese	0	1	1	1	25	122	72	0	59.49	6.57	0	1.66	9.07069	2.32	2.08	3.22	3.91
130	Undergraduate	Married	85	Han Chinese	0	1	1	1	30	132	70	0	96.73	5.93	0	3.07	9.58306	2.93	2.09	4.96	4.77
131	College	Married	66	Han Chinese	0	1	0	0	27	107	68	0	80.71	5.08	0	4.48	9.80629	3.07	2.3	3.99	5.24
132	Undergraduate	Married	80	Uighur	1	1	1	0	22	138	86	0	73.13	4.44	0	1.4	8.50848	2.49	2.24	3.53	3.98
133	College	Married	62	Han Chinese	0	1	0	0	24	105	60	0	140.6	6.81	0	1.2	8.78207	1.69	2.28	4.16	3.26
134	High School	Married	77	Han Chinese	0	1	1	0	24	150	80	1	98.5	9.07	1	1.45	9.25789	4.6	2.38	3.4	6.18
135	College	Married	79	Uighur	1	1	1	0	27	130	73	0	59.93	5.87	0	0.95	8.39992	1.81	2.21	3.99	3.3
136	High School	Married	76	Han Chinese	0	1	0	0	18	120	80	0	59.14	10.68	1	0.89	8.9332	1.39	2.24	3.98	3.56
139	College	Married	43		0	0	0	0	23.1241	133	81	0	102.7	5.55	0	0.78	8.14669	2.42	2.41	3.86	4.51
145	College	Married	41		0	0	1	1	20.9024	109	75	0	77.2	5.7	0	0.75	8.13414	2.31	2.33	3.9	3.76
146	High School	Married	45		0	0	0	0	21.4844	106	76	0	55.4	4.97	0	0.74	7.98367	2.62	2.35	3.9	4.24
148	College	Married	44		0	0	0	1	25.3069	131	84	0	83.6	5.91	0	1.35	8.75811	2.92	2.46	3.45	4.91
149	Junior High School	Married	43		0	0	0	0	23.255	128	80	0	73.4	5.59	0	0.68	8.01667	1.77	2.39	4.24	3.66
152	Secondary School	Married	46		0	0	0	0	23.6614	139	85	0	73	4.92	0	0.75	7.98698	2.3	2.47	4.61	4.53
154	College	Married	45		1	0	0	1	33.6593	132	88	0	80	6.04	0	3.02	9.58502	1.26	2.42	3.61	3.05
157	College	Married	44		0	0	0	0	22.0604	114	72	0	46.7	4.51	0	0.38	7.22007	1.9	2.15	3.92	3.72
158	High School	Married	48		0	0	1	1	22.6474	115	77	0	88.1	4.41	0	1.03	8.19479	3.33	2.36	4.17	5.16
160	Secondary School	Married	52		0	0	0	0	20.7612	132	83	0	43.8	6.23	0	1.25	8.73388	2.01	2.26	5.73	4.07
164	Secondary School	Married	40		1	0	1	1	25.9516	122	75	0	66	4.81	0	0.73	7.93734	2.13	2.45	4.1	4.63
165	Secondary School	Married	44		1	0	1	1	24.6914	104	64	0	87.7	4.75	0	1.17	8.3965	3.37	2.39	4.59	4.97
167	Junior High School	Married	45		0	0	1	1	23.7196	109	81	0	61.6	6.19	0	2.04	9.21724	3.16	2.28	3.8	4.82
169	Secondary School	Married	41		1	0	1	1	21.9713	115	74	0	67.4	4.73	0	1.67	8.74811	2.46	2.5	3.98	4.2
171	Junior High School	Married	50		0	0	1	0	24.977	131	81	0	55.4	6.88	0	3.22	9.77936	2.01	2.42	4.01	3.9
172	Secondary School	Married	44		1	0	1	1	23.5479	131	79	0	90	5.86	0	1.12	8.56283	2.84	2.4	4.46	4
175	College	Married	44		0	0	1	1	23.0546	131	71	0	112.1	5.68	0	1.03	8.44787	2.48	2.42	4.18	4.45
176	Secondary School	Married	47		0	0	1	1	29.4118	124	81	0	86	5.96	0	1.97	9.14446	2.27	2.17	3.88	3.78
177	Secondary School	Married	46		0	0	1	0	22.1003	112	80	0	62.1	5.31	0	0.63	7.88891	2.58	2.43	4.01	4.34
179	Junior High School	Married	59		0	0	1	1	26.4236	130	80	0	66	5.01	0	2.39	9.16409	2.13	2.34	4.09	3.95
180	High School	Married	48		1	0	0	0	27.4587	124	70	0	75	6.05	0	1.54	8.9132	2.5	2.51	4.12	4.56
181	Junior High School	Married	40		1	0	1	1	25.3934	138	85	0	74.3	4.19	0	2.39	8.98535	2.59	2.61	4.3	4.82
182	High School	Married	48		0	0	0	0	19.91	126	69	0	55.9	4.89	0	1.04	8.30777	3.22	2.38	3.85	5.19
183	College	Married	53		0	0	0	1	26.3958	121	73	0	59.4	4.75	0	1.06	8.29777	2.21	2.48	4.08	3.61
185	High School	Married	46		0	0	0	0	24.2188	126	86	0	61.4	4.68	0	0.74	7.92355	2.91	2.26	4.09	5.15
189	College	Married	41		1	0	0	1	28.7197	127	76	0	119.03	4.61	0	1.37	8.5244	3.25	2.47	4.51	5.09
192	College	Married	40		0	0	1	1	28.7347	122	86	0	72.1	5.81	0	1.46	8.81937	2.62	2.56	4.48	4.29
193	Secondary School	Married	46		0	0	0	0	25.2595	138	81	0	73.2	5.04	0	3.23	9.47124	2.21	2.48	4.63	4.38
200	College	Married	41		0	0	1	1	24.4898	97	70	0	77.2	4.94	0	1.21	8.46934	2.74	2.39	4.31	4.89
202	Secondary School	Married	57		0	0	1	1	21.2585	98	65	0	81	4.77	0	0.81	8.03298	2.2	2.32	4.29	3.99
203	Junior High School	Married	54		0	0	0	1	23.3234	118	86	0	113.5	4.51	0	2.31	9.0249	2.52	2.28	3.79	4.27
204	Secondary School	Married	47		1	0	1	0	29.4118	116	74	0	89.1	6.02	0	0.8	8.2533	2.51	2.27	4.67	4.14
205	College	Married	48		0	0	0	1	25.1486	102	53	0	55.8	4.36	0	0.6	7.643	2.84	2.56	4.48	4.62
206	College	Married	43		0	0	0	1	27.4348	115	74	0	73.7	4.8	0	1.11	8.35433	3.08	2.21	3.79	5.02
207	College	Married	46		0	0	0	1	26.1427	106	82	0	39.8	5.2	0	1.03	8.35957	2.87	2.37	4.26	4.68
210	High School	Married	52		0	0	0	0	24.8016	111	81	0	72.8	5.6	0	1.87	9.03006	2.47	2.25	4.07	4.05
211	High School	Married	48		1	0	0	0	26.5668	133	77	0	119.3	5.4	0	0.92	8.28437	2.52	2.24	4.58	4.18
212	College	Married	40		1	0	1	1	25.5354	118	70	0	69.1	5.49	0	1.2	8.56661	2.17	2.24	4.69	3.73
213	Junior High School	Married	50		0	0	1	0	28.4053	102	75	0	62.7	5.19	0	1.38	8.65017	3.13	2.25	4.1	5.13
214	High School	Married	50		0	0	0	0	27.1809	117	75	0	109.3	5.85	0	0.71	8.10531	2.43	2.2	4.14	4.54
221	High School	Married	48		0	0	1	1	24.1633	124	76	0	85.07	4.99	0	3.43	9.52135	2.11	2.3	4.36	4.1
224	Secondary School	Married	48		1	0	1	1	25.5102	116	84	0	85.64	5	0	2.03	8.99883	3.22	2.35	4.15	5.05
226	Secondary School	Married	49		0	0	0	1	23.2254	134	88	0	32.7	4.72	0	1.16	8.38159	2.62	2.23	3.92	4.29
227	Secondary School	Married	50		0	0	1	1	21.2245	118	67	0	111.7	5.02	0	0.56	7.71497	2.4	2.34	4.1	4.23
228	High School	Married	47		0	0	0	0	24.5351	117	60	0	69.4	5	0	0.99	8.28074	2.78	2.32	3.89	4.66
230	Secondary School	Married	49		1	0	1	1	29.7619	132	89	0	65.1	4.91	0	1.2	8.45495	2.34	2.26	4.13	4.37
232	High School	Married	45		0	0	0	0	22.8571	134	87	0	55.8	5.76	0	0.79	8.19657	2	2.46	4.68	3.73
233	Junior High School	Married	53		0	0	1	0	26.0617	130	84	0	90.6	5.48	0	1.34	8.67513	2.68	2.34	4.34	4.01
234	Junior High School	Married	54		0	0	1	1	28.3737	131	72	0	111.97	4.78	0	1.04	8.28502	3.38	2.29	4.47	5.12
235	College	Married	41		1	0	1	1	28.7197	127	76	0	119.03	4.61	0	1.37	8.5244	3.25	2.47	4.51	5.09
248	Junior High School	Married	50		0	0	0	1	23.0546	139	87	0	107	5.52	0	0.98	8.36953	1.61	2.38	4.05	3.7
249	Junior High School	Married	47		0	0	1	0	30.0838	138	86	0	76	5.62	0	2.03	9.11572	3.04	2.31	4.28	4.86
250	College	Married	47		0	0	1	1	28.3782	122	89	0	56	6.54	0	1.7	9.08992	3.09	2.49	4.21	5.01
253	Secondary School	Married	50		0	0	1	1	25.6173	110	80	0	69	6.31	0	3.36	9.73543	2.45	2.43	4.06	4.69
254	Secondary School	Married	48		0	0	1	1	20.1995	114	74	0	64	5.17	0	1.74	8.87811	2.85	2.15	4.38	4.94
256	Junior High School	Married	44		1	0	1	1	29.4118	123	70	0	117	4.92	0	0.87	8.1354	2.4	2.36	4.46	3.92
267	Secondary School	Married	48		0	0	1	1	19.7897	114	60	0	46.7	5.05	0	0.84	8.12639	2.33	2.28	3.83	3.82
271	College	Married	41		0	0	1	1	21.8776	111	71	0	72.9	5.73	0	0.69	8.05601	2.9	2.31	3.78	4.99
281	Secondary School	Married	49		1	0	0	0	26.8544	119	70	0	86.6	5.1	0	0.77	8.04923	2.62	2.29	4.24	4.9
283	High School	Married	52		1	0	0	0	29.0657	124	86	0	62	4.81	0	0.61	7.75776	1.96	2.19	3.85	4.24
304	College	Married	47		0	0	1	0	25.1808	125	85	0	65.8	5.14	0	1.39	8.64771	3.01	2.34	4.17	4.93
307	High School	Married	40		0	0	0	1	21.9713	138	80	0	53.3	5.78	0	0.66	8.02024	2.27	2.41	4.15	3.93
310	Junior High School	Married	46		0	0	0	0	26.3656	124	70	0	88.4	5.53	0	0.53	7.75667	2.61	2.31	4.06	4.43
314	College	Married	45		0	0	1	1	27.7634	112	72	0	58.7	5.72	0	0.66	8.00981	2.75	2.21	3.88	4.33
317	Junior High School	Married	50		0	0	1	1	24.281	120	77	0	59.6	5.17	0	1.15	8.46399	3.3	2.25	4.25	5.01
320	College	Married	41		0	0	1	1	29.4107	110	66	0	79.1	5.62	0	1.17	8.56469	2.66	2.36	4.07	4.56
322	Junior High School	Married	43		0	0	1	1	24.539	102	64	0	60.6	5.7	0	0.51	7.74848	2.55	2.18	3.98	4.59
340	College	Married	44		0	0	0	0	21.5139	135	86	0	53.1	5.21	0	1.8	8.91972	2.46	2.42	3.83	4.15
342	Secondary School	Married	46		1	0	1	1	27.0993	129	60	0	73.5	4.45	0	1.12	8.28759	2.41	2.34	4.33	4.2
369	College	Married	46		0	0	1	1	31.1419	134	78	0	59.7	5.29	0	1.72	8.8895	3.33	2.16	4.3	4.91
370	Secondary School	Married	49		1	0	0	1	25.1024	124	84	0	85.2	4.34	0	2.1	8.89117	2.65	2.3	4.5	4.35
378	College	Married	46		0	0	1	1	23.8281	101	65	0	85.15	5.34	0	1.9	8.99844	2.34	2.37	3.92	4.15
383	High School	Married	50		1	0	1	0	28.4091	134	82	0	75.9	4.69	0	0.57	7.66467	2.22	2.16	4.01	3.79
385	Junior High School	Married	43		0	0	1	1	26.5668	135	87	0	46.5	5.3	0	0.58	7.80434	2.7	2.34	4.21	4.36
386	Junior High School	Married	48		0	0	1	1	23.7954	122	64	0	89.3	4.8	0	3.4	9.47375	2.32	2.43	4.21	4.63
387	Junior High School	Married	52		0	0	0	1	25.9516	115	75	0	80.62	4.9	0	0.98	8.25039	3	2.43	4.89	4.79
388	Junior High School	Married	50		1	0	0	0	23.5883	118	62	0	60.8	5.47	0	0.39	7.43903	1.93	2.35	4.09	4.16
389	Junior High School	Married	50		0	0	0	1	25.963	124	74	0	92.6	4.97	0	1.17	8.44178	2.67	2.31	3.97	4.4
390	Junior High School	Married	48		0	0	1	1	23.4075	112	76	0	58.6	5.28	0	1.26	8.57639	2.92	2.17	4.38	4.63
391	Secondary School	Married	50		0	0	1	1	22.2291	115	81	0	53	4.6	0	0.77	7.94605	2.48	2.17	3.79	4.79
395	Junior High School	Married	55		0	0	0	1	25.0593	132	81	0	44.2	4.65	0	0.77	7.95686	3.15	2.28	4.16	4.81
399	High School	Married	55		0	0	1	1	24.3438	124	74	0	99.3	5.25	0	0.95	8.28829	3.16	2.35	5.14	4.87
405	Secondary School	Married	44		0	0	0	1	26.7299	107	75	0	56.22	4.22	0	2.32	8.96276	2.92	2.44	4.2	4.58
407	Undergraduate	Married	42		0	0	1	1	26.2773	123	78	0	69.38	4.68	0	2	8.9178	2.19	2.32	4.39	3.81
411	College	Married	43		0	0	1	1	20.202	116	79	0	58.1	4.92	0	1.91	8.92177	3.02	2.3	3.71	4.9
413	College	Married	45		0	0	0	1	23.8367	124	85	0	68.5	5.1	0	0.75	8.02291	3.04	2.24	4.11	4.95
416	College	Unmarried	53		1	0	1	1	25.2826	120	78	0	36.3	5.76	0	2.26	9.24766	3.03	2.16	3.78	4.96
417	Undergraduate	Married	41		0	0	0	1	23.1834	111	79	0	74.1	4.59	0	1.08	8.2822	2.23	2.31	3.99	4.21
418	College	Married	46		0	0	1	1	23.7654	125	78	0	125.6	5.22	0	1.38	8.65594	2.62	2.37	4.71	4.7
419	College	Married	40		1	0	1	0	29.7619	119	74	0	79.6	4.8	0	0.62	7.77194	3.22	2.5	4.11	5.02
420	College	Married	42		0	0	1	1	23.7118	103	64	0	60.86	4.64	0	1.11	8.32043	1.65	2.36	4.33	3.15
421	College	Married	40		0	0	0	1	24.4473	121	79	0	41	4.9	0	1.02	8.29039	2.99	2.4	4.05	5.14
426	College	Married	47		0	0	1	1	25.0399	132	78	0	84.1	5.77	0	1.02	8.45383	2.14	2.26	4.96	4.26
427	Undergraduate	Married	41		1	0	0	0	20.5049	107	79	0	64.6	4.75	0	0.4	7.32321	1.99	2.17	4.06	4.41
428	Junior High School	Married	53		0	0	1	1	28.3737	134	78	0	67.58	4.84	0	2.3	9.09118	3.19	2.54	4.66	4.53
430	Junior High School	Married	49		1	0	1	1	30.6689	117	85	0	80	4.94	0	0.67	7.87824	2.28	2.24	4.11	3.95
432	College	Married	52		0	0	0	1	21.9671	124	82	0	57.8	6.2	0	0.89	8.38937	3.12	2.3	4.38	5.13
433	Undergraduate	Married	42		0	0	1	1	23.8754	126	84	0	90.4	4.51	0	3.67	9.48785	2.61	2.37	4.02	4.85
435	High School	Married	47		0	0	0	0	19.9445	110	69	0	51	4.89	0	0.48	7.53458	2.58	2.21	4.15	4.72
436	College	Married	49		0	0	0	1	24.9135	119	83	0	54.1	5.09	0	1.49	8.70741	3.32	2.15	4.04	4.87
441	Secondary School	Married	44		1	0	0	0	22.4766	98	62	0	120.96	4.81	0	0.66	7.83654	2.96	2.75	4.7	4.73
442	High School	Married	41		1	0	1	1	26.5731	119	76	0	88.31	4.87	0	1.16	8.41287	2.75	2.38	4.11	4.84
447	College	Married	49		0	0	1	1	23.6652	117	75	0	72.5	5.3	0	1.25	8.57221	3.32	2.51	4.15	4.78
449	Secondary School	Married	44		0	0	0	1	25.1486	110	63	0	51.77	4.96	0	0.55	7.68493	1.82	2.29	4.5	3.17
452	Secondary School	Married	44		0	0	1	0	28.7197	119	70	0	75.66	5.05	0	0.66	7.88523	2.34	2.28	4.41	4.03
454	College	Married	40		0	0	0	0	21.4844	103	70	0	59.3	4.64	0	0.73	7.90136	2.67	2.28	4.31	4.95
455	College	Married	44		0	0	0	1	26.6436	115	82	0	80.16	4.9	0	1.02	8.29039	2.85	2.27	4.19	4.68
468	Junior High School	Unmarried	49		0	0	0	0	27.852	112	60	0	53.6	5.69	0	0.37	7.42581	2.56	2.33	4.26	5.18
476	College	Married	41		0	0	1	1	22.4913	120	89	0	108.9	4.89	0	2.3	9.10146	2.35	2.57	3.91	4.17
480	College	Married	45		1	0	0	0	25.2595	113	73	0	87.2	5.43	0	1.27	8.61231	2.5	2.35	4.41	4.49
481	Undergraduate	Married	49		1	0	0	1	28.0864	112	78	0	85.5	5.87	0	0.95	8.39992	2.67	2.55	4.97	4.18
482	College	Married	42		0	0	1	1	26.1493	125	85	0	67	5.49	0	3.51	9.6399	2.87	2.5	4.2	5.12
483	High School	Married	47		0	0	0	0	26.6728	107	73	0	51.8	5.36	0	0.93	8.28775	2.81	2.33	3.45	4.67
484	High School	Married	45		1	0	0	1	34.6268	126	85	0	79.7	5.72	0	1.3	8.68769	2.91	2.22	4.2	4.71
489	Junior High School	Married	52		0	0	1	1	21.6296	107	78	0	62.6	4.95	0	1.5	8.68621	3.12	2.28	4.37	4.79
490	College	Married	41		0	0	0	1	23.8751	120	75	0	39.2	5.08	0	0.47	7.55165	2.31	2.08	3.68	4.15
494	Secondary School	Married	48		1	0	0	1	30.8365	116	76	0	73.7	6.15	0	2.35	9.35222	3.18	2.27	4.43	4.85
495	Secondary School	Married	40		1	0	1	1	24.5089	135	89	0	65.2	5.71	0	2.25	9.23451	3.03	2.5	4.25	5.06
499	College	Married	44		0	0	1	0	22.1453	113	78	0	82.7	6.01	0	2.67	9.45686	2.98	2.37	4.09	4.86
503	High School	Married	48		0	0	0	1	26.9896	136	81	0	77.8	6.36	0	3.6	9.81232	2.67	2.28	4.06	4.54
504	College	Married	44		0	0	1	1	19.8413	105	80	0	86.5	5.22	0	1.48	8.7259	3.09	2.32	3.82	4.69
507	High School	Unmarried	48		1	0	1	0	25.2595	129	72	0	122.2	5.16	0	1.24	8.5374	2.23	2.18	4.18	3.66
508	College	Married	41		0	0	1	1	26.449	134	78	0	43.9	5.11	0	1.97	8.99059	3.21	2.38	4.38	5.09
510	Secondary School	Married	44		1	0	0	0	26.5731	123	67	0	72	4.2	0	2.19	8.90034	3.3	2.33	4.15	4.9
512	College	Married	44		0	0	1	1	20.0155	121	70	0	79.1	5.34	0	1.63	8.84516	2.3	2.37	4.22	4.22
513	Junior High School	Married	52		0	0	1	0	27.3982	125	85	0	55.1	5.01	0	3.98	9.67407	3.13	2.28	4.26	5.1
514	High School	Married	49		0	0	0	0	22.4712	110	79	0	50.4	6.24	0	0.71	8.16985	2.59	2.32	4	4.26
516	College	Married	52		0	0	1	1	25.3906	105	66	0	67.7	4.64	0	1.88	8.84734	2.54	2.24	4.12	4.36
518	College	Married	41		1	0	1	1	25.2595	123	79	0	87.74	5.46	0	2.75	9.39041	2.8	2.51	4.07	5.07
519	Secondary School	Married	54		1	0	0	0	28.0816	128	83	0	70.86	5.37	0	1	8.36218	2.89	2.43	4.13	4.49
520	College	Married	43		0	0	0	0	25.4767	114	71	0	64.2	5.32	0	1.52	8.77154	2.62	2.27	4.14	4.71
521	College	Married	55		0	0	0	1	25.8645	118	83	0	59.2	5.08	0	1.57	8.75774	2.57	2.31	3.95	4.69
522	College	Married	49		0	0	1	1	32.8769	138	89	0	57.7	5.69	0	1.73	8.96819	2.78	2.36	4.05	4.53
523	College	Married	46		0	0	1	0	25.6896	133	76	0	102.44	5.57	0	1.7	8.92938	2.81	2.48	4.72	4.61
525	Junior High School	Married	50		0	0	1	1	23.03	136	89	0	66.09	4.82	0	1.23	8.46114	2.76	2.22	3.88	4.64
529	Secondary School	Married	43		1	0	1	1	22.0386	129	83	0	82	4.95	0	0.48	7.54677	2.42	2.29	4.42	4.58
531	Junior High School	Married	52		1	0	1	1	27.6361	130	77	0	54.83	5.77	0	2.07	9.16158	1.95	2.37	4.12	3.43
532	College	Married	40		0	0	1	1	23.8895	121	85	0	79.5	4.8	0	0.77	7.98861	2.18	2.33	4.29	3.9
536	Junior High School	Married	45		1	0	1	1	26.0617	128	78	0	68.5	4.79	0	3.27	9.43268	2.52	2.21	4.53	4.52
539	College	Married	48		0	0	1	1	28.0277	131	79	0	93.2	5	0	0.91	8.19648	2.06	2.34	3.92	4.08
540	High School	Married	50		0	0	1	1	26.4236	130	82	0	92.5	5.45	0	0.96	8.33615	3.07	2.34	4.35	5.09
541	College	Married	43		1	0	0	0	24.0346	122	78	0	47.7	4.97	0	1.55	8.72303	2.45	2.16	4.01	3.79
546	College	Married	43		0	0	0	0	19.052	101	65	0	39.3	4.92	0	0.73	7.95995	2.13	2.21	3.74	4.25
547	College	Married	47		0	0	0	0	20.7612	117	75	0	37.7	4.3	0	0.72	7.81147	2.43	2.24	3.52	4.35
549	College	Married	45		0	0	0	1	25.0135	118	57	0	50.6	4.53	0	1.47	8.57734	1.63	2.53	3.97	3.79
550	College	Married	43		0	0	0	0	20.7031	128	76	0	39.8	4.78	0	0.41	7.3542	2.66	2.35	3.62	4.62
553	High School	Married	40		0	0	0	0	26.4463	122	84	0	58.1	5.29	0	1.42	8.69783	2.69	2.27	4.37	4.69
555	High School	Married	47		0	0	0	0	19.052	111	65	0	56.8	5.09	0	1.41	8.65222	2.3	2.21	4.32	4.78
556	College	Married	41		1	0	0	0	27.7778	120	79	0	69.5	4.59	0	3.07	9.32691	2.99	2.35	3.64	4.75
557	College	Married	41		0	0	0	1	22.2656	115	65	0	52.7	4.6	0	0.87	8.06815	2.27	2.29	4.08	4.23
558	Secondary School	Married	44		1	0	0	0	23.1473	136	78	0	72.4	4.33	0	0.54	7.53074	2.42	2.35	3.93	4.61
561	Secondary School	Married	48		0	0	0	0	19.4674	117	65	0	63.2	4.73	0	1.68	8.75408	2.52	2.3	3.98	4.61
562	High School	Married	47		1	0	0	0	20.9644	124	60	0	73.8	4.75	0	0.5	7.54635	2.57	2.23	4.08	4.74
563	High School	Married	50		1	0	0	0	23.1473	115	69	0	73.6	4.86	0	0.71	7.9199	2.56	2.29	4.11	5.19
564	High School	Married	50		0	0	0	0	20.5693	117	67	0	42.6	5.33	0	0.43	7.51074	2.03	2.15	3.37	3.87
565	College	Married	50		0	0	0	0	28.0404	111	57	0	56	4.98	0	1.09	8.37296	2.66	2.19	4.04	3.91
566	College	Married	45		0	0	0	0	28.0404	111	57	0	56	4.98	0	1.09	8.37296	2.66	2.19	4.04	3.91
567	High School	Married	47		0	0	1	1	19.6052	112	66	0	79	5.24	0	0.71	7.99519	2.9	2.26	3.94	4.7
568	College	Married	45		0	0	1	0	28.7347	133	74	0	69.6	4.48	0	1.84	8.79075	2.5	2.11	3.9	4.33
569	College	Married	54		1	0	1	1	21.9525	114	74	0	86	5.18	0	1.13	8.44838	2.75	2.32	4.03	4.88
570	College	Married	46		0	0	0	1	25.3906	116	57	0	44	4.5	0	1.13	8.30765	2.98	2.2	3.84	4.31
571	High School	Married	48		1	0	0	0	25.9107	128	73	0	76	5.09	0	0.92	8.22525	2.7	2.21	4.18	4.2
572	Secondary School	Married	49		0	0	0	0	26.7094	118	68	0	67	4.69	0	1.39	8.55609	1.66	2.16	3.95	3.35
573	College	Married	42		0	0	0	1	22.9398	119	76	0	51.7	4.49	0	1.19	8.35716	3.01	2.25	4.18	5.07
575	College	Married	45		0	0	0	0	20.0288	129	80	0	45.1	4.66	0	0.51	7.54703	1.86	2.23	4.1	3.92
576	College	Married	41		0	0	0	1	22.6003	107	66	0	44.3	5.54	0	0.53	7.75847	2.57	2.22	4.36	4.47
577	Secondary School	Married	48		1	0	0	0	26.2188	132	89	0	64.2	4.28	0	1.49	8.53409	3.05	2.22	3.97	5.18
578	Secondary School	Married	46		0	0	1	1	27.5134	117	72	0	59.4	6.1	0	1.07	8.5573	3.12	2.21	3.83	4.87
580	College	Married	40		0	0	0	1	22.68	114	76	0	46.51	5.17	0	0.49	7.61088	3.11	2.39	4.27	4.48
581	Undergraduate	Married	43		0	0	0	0	20.1951	132	82	0	69.1	4.91	0	0.97	8.24217	2.28	2.27	3.44	4.35
582	College	Married	46		0	0	0	0	20.5693	108	53	0	51.1	4.78	0	0.93	8.17323	1.94	2.17	3.8	3.49
583	High School	Married	49		1	0	0	0	28.578	119	70	0	41.5	5.19	0	0.37	7.33384	1.7	2.13	3.92	3.5
584	High School	Married	52		0	0	1	0	20.5499	108	63	0	47.7	4.76	0	0.37	7.24735	2.12	2.3	3.83	3.88
585	High School	Married	49		0	0	0	1	21.0772	110	73	0	37.2	4.67	0	1.7	8.75314	2.92	2.37	4.45	5.06
586	High School	Married	45		1	0	1	1	25.5296	98	69	0	102	5.15	0	3.85	9.66843	2.51	2.35	4.21	4.05
587	College	Married	48		0	0	0	0	22.4913	121	68	0	70.1	5.61	0	0.78	8.15745	2.85	2.26	4.14	4.89
588	College	Married	41		0	0	0	1	29.1363	120	80	0	82.3	5.11	0	1.2	8.49488	2.1	2.28	4.02	3.78
589	College	Married	42		1	0	0	1	24.6181	120	87	0	68.8	4.67	0	2.03	8.93055	2.59	2.34	4.6	4.51
590	College	Married	46		0	0	0	1	21.0772	118	74	0	43.2	4.82	0	0.5	7.56098	2.7	2.27	4.31	4.88
591	College	Married	45		0	0	0	1	19.9219	105	53	0	34	4.98	0	0.48	7.55282	2.03	2.25	4.11	3.72
592	College	Married	40		1	0	0	0	20.3125	120	68	0	51.4	4.95	0	0.88	8.15291	2.17	2.24	3.57	4.18
593	Undergraduate	Married	46		0	0	0	0	20.5499	114	59	0	60.7	5.31	0	0.57	7.78883	1.77	2.09	4.42	3.65
594	College	Married	45		0	0	0	0	22.6003	122	66	0	53.3	5.04	0	0.83	8.11243	2.35	2.23	4.01	4.7
603	Undergraduate	Married	44		0	0	0	0	22.8624	112	67	0	120.2	5.46	0	1.11	8.48317	3.22	2.33	4.17	5.13
604	Secondary School	Married	50		0	0	1	1	23.4375	123	77	0	55.6	4.65	0	1.62	8.70065	2.82	2.19	4.35	4.56
606	College	Married	45		1	0	0	1	28.0863	125	81	0	79.6	4.5	0	1.14	8.31646	2.83	2.28	3.59	4.6
608	High School	Married	46		0	0	0	0	20.202	119	38	0	45.3	4.7	0	0.54	7.61273	2.83	2.34	4.08	4.95
609	College	Married	45		0	0	0	0	21.6713	125	77	0	66	4.47	0	0.65	7.74796	2.68	2.29	4.31	4.9
610	College	Married	42		1	0	0	1	27.6888	136	85	0	77.8	5.08	0	0.67	7.90619	3.22	2.09	4.28	5.15
613	Secondary School	Married	43		1	0	1	1	22.0932	134	81	0	86.64	4	0	2.93	9.14265	2.43	2.36	4.5	4.77
614	College	Married	44		0	0	0	0	27.1178	110	68	0	99.1	5.63	0	1.41	8.75306	2.55	2.23	3.63	4.21
619	College	Married	44		0	0	0	1	20.3954	110	69	0	76.9	5.74	0	0.74	8.12771	2.65	2.06	4.6	4.99
622	College	Married	47		0	0	0	0	22.4323	119	54	0	54.2	4.86	0	0.98	8.24219	2.21	2.23	4.13	3.97
623	High School	Married	47		0	0	0	1	21.83	108	70	0	61.6	4.62	0	0.81	8.00103	1.96	2.29	4.13	4.09
624	College	Married	45		0	0	0	1	17.9982	99	73	0	51.4	5.08	0	1.06	8.36494	2.14	2.39	4.44	4.31
627	College	Married	48		0	0	1	1	23.4568	114	84	0	63.3	4.64	0	1.44	8.58071	3.08	2.33	4.76	4.99
630	Secondary School	Married	41		1	0	1	1	26.1224	120	74	0	79.8	4.38	0	0.82	7.95995	2.89	2.32	4.4	4.49
631	College	Married	41		1	0	1	0	25.6489	120	76	0	59	5.16	0	0.77	8.06093	1.68	2.27	3.95	3.19
632	College	Married	44		0	0	0	0	20.3125	113	70	0	69.5	4.73	0	2.91	9.30343	3	2.25	3.93	5.14
633	High School	Married	50		0	0	1	1	23.6713	114	72	0	70	6.33	0	1.55	8.96491	3.09	2.3	4.01	4.65
636	College	Married	42		1	0	0	0	23.1473	128	70	0	55	5.03	0	1.11	8.40114	2.9	2.05	4	4.27
639	College	Married	44		0	0	0	0	24.4898	122	89	0	87	4.8	0	1.37	8.56478	3.13	2.26	4.01	4.39
640	College	Married	47		0	0	0	0	26.4236	98	62	0	66	5.06	0	1.3	8.56509	2.33	2.32	4.13	3.7
641	Secondary School	Married	40		1	0	1	1	30.478	132	83	0	56	5.09	0	3.84	9.65411	2.19	2.31	4.06	4.31
644	Secondary School	Married	44		0	0	0	0	26.8977	118	78	0	79.2	4.74	0	1.25	8.46054	2.98	2.41	4.46	4.74
645	Secondary School	Married	45		0	0	0	1	21.0962	116	70	0	43	4.43	0	1.12	8.28308	2.26	2.35	3.94	4.18
646	Undergraduate	Married	44		0	0	0	1	23.2335	121	82	0	61	4.42	0	0.76	7.89306	2.09	2.37	4.14	3.51
647	College	Married	50		0	0	0	0	25.3906	119	62	0	100	5.21	0	1.33	8.61712	2.87	2.34	4.23	4.6
648	Junior High School	Married	44		0	0	0	1	22.2222	84	58	0	71	5.19	0	1.09	8.41427	1.55	2.23	4.11	3.37
649	Secondary School	Married	48		0	0	1	1	23.2438	111	77	0	80	4.84	0	1.04	8.29749	2.14	2.28	3.96	3.5
650	College	Married	51		0	0	1	1	23.5102	109	80	0	91	5.2	0	1.71	8.86651	3.35	2.33	4.23	4.83
651	College	Married	46		0	0	0	0	21.9261	114	74	0	63.7	4.35	0	0.74	7.85043	2.83	2.34	4.36	5.09
652	High School	Married	50		1	0	1	1	29.1363	124	75	0	127.1	5.12	0	0.91	8.2202	2.57	2.23	4.39	4.4
653	High School	Married	50		0	0	0	1	22.2222	116	79	0	57.02	5.2	0	0.64	7.88373	2.19	2.3	4.31	4.46
654	High School	Married	42		0	0	0	1	24.2188	105	76	0	56.98	4.37	0	0.98	8.13592	2.99	2.43	4.09	4.83
655	High School	Married	48		1	0	0	0	23.3091	111	62	0	58.12	4.04	0	0.53	7.44272	2.33	2.33	4.35	4.51
656	High School	Married	50		0	0	1	1	21.3599	106	53	0	91	4.62	0	1	8.21175	2.32	2.36	3.93	4.78
657	Secondary School	Married	50		0	0	0	0	24.093	128	79	0	58.5	5.2	0	0.96	8.28919	2.41	2.21	3.86	4.61
658	High School	Married	44		0	0	0	1	26.0375	106	79	0	57	5.08	0	0.77	8.0453	2.61	2.25	3.97	4.49
659	High School	Married	43		1	0	0	1	23.8751	126	89	0	91.83	5.21	0	1.24	8.54705	2.62	2.48	4.08	5.03
660	High School	Married	48		1	0	0	0	24.8889	118	70	0	50.1	5.22	0	1.15	8.47362	2.17	2.24	4.38	4.08
661	High School	Married	48		1	0	1	0	28.6288	105	86	0	69.8	5.25	0	0.72	8.01108	1.86	2.24	4.47	3.82
662	College	Married	50		0	0	1	1	25.5937	134	89	0	102	5.07	0	0.73	7.98999	2.59	2.42	4.37	4.97
663	Junior High School	Married	43		0	0	1	1	30.0041	116	73	0	106	5.4	0	0.9	8.26239	2.44	2.28	4.23	4.47
664	High School	Married	49		1	0	0	0	24.3418	120	72	0	70.67	4.35	0	0.59	7.6239	2.63	2.27	4.61	4.57
665	Junior High School	Married	45		0	0	0	0	23.833	90	57	0	68.95	4.24	0	1.01	8.13587	2.15	2.43	4.37	3.98
666	Secondary School	Married	45		0	0	0	1	27.8159	129	65	0	55.5	5.37	0	2.24	9.16866	3.07	2.36	3.73	4.7
667	College	Married	42		0	0	0	0	19.5556	113	59	0	37.3	5.39	0	0.63	7.90387	2.16	2.12	3.82	4.76
668	High School	Married	48		0	0	0	0	23.4221	119	72	0	61	5.65	0	0.69	8.04195	2.21	2.39	4.43	4.38
669	College	Married	42		0	0	0	0	28.0404	129	84	0	71.8	4.66	0	3.07	9.34205	2.49	2.28	4.01	4.37
670	High School	Married	47		0	0	0	0	23.7118	140	66	0	64.5	4.9	0	1.11	8.37495	2.53	2.26	4.19	4.03
671	High School	Married	48		1	0	0	1	26.5731	128	87	0	87.4	5.47	0	0.89	8.2641	2.53	2.21	4.01	4.95
672	College	Married	42		0	0	0	0	22.3081	120	80	0	85	5.12	0	1.38	8.63659	2.99	2.33	4.08	5.07
673	High School	Married	49		0	0	0	1	21.4533	105	66	0	67.8	4.58	0	0.74	7.90195	2.39	2.49	3.81	4.59
674	High School	Married	47		1	0	0	0	22.151	100	72	0	66.5	4.91	0	1.25	8.49577	2.82	2.35	4.04	4.75
675	Secondary School	Unmarried	49		0	0	0	0	21.9671	94	55	0	42.4	4.78	0	0.54	7.62961	2.73	2.35	4.12	5.04
676	Secondary School	Married	42		1	0	0	0	23.0112	101	58	0	39	4.53	0	0.82	7.99363	2.55	2.16	4.35	4.57
677	College	Married	43		0	0	1	1	27.7744	138	85	0	83.2	6.09	0	1.1	8.58331	2.79	2.38	4.3	4.64
678	Junior High School	Married	49		1	0	0	0	30.116	100	70	0	101.4	5.02	0	0.89	8.17825	2.79	2.34	4.34	4.99
679	Secondary School	Married	46		1	0	0	0	22.3133	106	53	0	84.42	4.82	0	0.63	7.79209	2.01	2.36	4.57	4.2
680	Secondary School	Unmarried	48		1	0	0	0	23.6244	123	73	0	64.2	4.66	0	0.62	7.74234	2.32	2.24	3.57	4.88
681	High School	Married	48		0	0	0	1	24.3418	120	66	0	60.18	5.15	0	1.2	8.50267	2.92	2.29	4.19	5.09
682	High School	Married	48		1	0	0	0	23.5666	105	58	0	65.43	4.64	0	0.72	7.88757	2.56	2.38	4.41	4.6
683	High School	Married	46		1	0	0	0	25.3906	118	82	0	69.1	4.85	0	1.03	8.28989	2.95	2.36	4.45	4.89
684	High School	Married	50		1	0	0	0	24.093	105	64	0	80	4.47	0	0.8	7.9556	2.54	2.52	4.87	4.74
685	High School	Married	52		1	0	1	0	24.2215	131	80	0	103.2	5.23	0	1.8	8.92355	3.33	2.21	4.2	5.19
687	College	Married	47		0	0	0	0	19.1953	115	70	0	73.17	4.96	0	0.68	7.8971	2.86	2.17	3.81	4.83
688	College	Married	48		0	0	0	0	22.68	120	68	0	70.3	4.84	0	0.32	7.11884	2.31	2.26	3.89	4.21
690	Undergraduate	Married	46		0	0	0	0	23.5556	108	65	0	52.9	4.64	0	0.54	7.59988	2.6	2.33	4.6	5.12
694	Secondary School	Married	42		1	0	0	1	22.2063	117	68	0	43.6	4.45	0	1.02	8.19406	2.14	2.06	3.89	4.33
698	College	Married	45		0	0	0	0	27.4691	109	71	0	80.5	5.09	0	4.12	9.72449	2.11	2.18	4.33	4.87
699	Secondary School	Married	46		0	0	0	0	24.2215	116	80	0	62.78	5.31	0	3.86	9.70162	2.48	2.4	3.77	4.38
702	Undergraduate	Married	46		0	0	1	1	18.3391	126	82	0	66	5.08	0	0.7	7.94999	2.18	2.34	3.65	4.93
703	Secondary School	Married	45		0	0	0	0	23.6713	105	74	0	66.9	4.91	0	0.67	7.87215	2.55	2.26	4.73	4.76
704	College	Married	44		0	0	1	1	25.3086	132	86	0	76.26	5.1	0	0.84	8.13624	1.9	2.45	3.63	3.08
705	College	Married	49		0	0	0	0	21.4536	115	62	0	61	4.86	0	0.66	7.84688	2.75	2.26	4.02	5.1
707	College	Married	41		0	0	0	0	20.0474	120	77	0	73.07	4.75	0	0.75	7.95182	2	2.33	4.02	4.16
708	College	Married	48		0	0	0	0	22.5827	103	57	0	88.06	4.76	0	0.54	7.62542	2.02	2.42	4.37	4.14
709	College	Married	46		0	0	0	1	20.9572	116	67	0	42.75	4.63	0	0.5	7.52077	2.21	2.39	4.1	4.35
711	College	Married	44		0	0	0	1	21.3382	121	81	0	67	4.48	0	0.74	7.87987	2.29	2.22	4.16	4
712	College	Married	50		0	0	0	1	21.7993	130	88	0	70.54	5.25	0	0.94	8.27771	3.12	2.29	4.3	4.84
713	Secondary School	Married	52		0	0	0	1	20.5714	105	61	0	80	5.07	0	0.93	8.23213	3.16	2.33	4.18	4.73
714	College	Married	42		0	0	1	1	24.811	128	86	0	74.32	4.94	0	1.68	8.79752	3.14	2.51	4.85	4.89
716	Secondary School	Married	43		1	0	0	0	23.4221	115	51	0	72.03	4.67	0	0.6	7.71169	2.87	2.16	4.23	4.6
718	College	Married	46		0	0	1	1	24.4898	131	80	0	77.4	4.43	0	2.29	8.99831	3.24	2.32	3.83	5.15
720	Undergraduate	Married	42		0	0	0	1	25.8166	130	89	0	50.9	5.35	0	0.63	7.89642	1.8	2.29	4.06	4.09
721	College	Married	44		0	0	0	1	20.3125	116	79	0	63.2	4.82	0	0.68	7.86847	2.43	2.24	4.03	5.11
722	Junior High School	Married	44		0	0	1	1	17.7154	98	62	0	82	4.47	0	0.88	8.05091	2.4	2.23	4.43	3.58
728	High School	Married	47		1	0	0	0	22.1003	122	75	0	83	5.05	0	0.89	8.18421	2.68	2.26	4.04	4.14
729	High School	Married	49		1	0	0	0	28.7201	110	69	0	74	4.79	0	0.67	7.84741	2.2	2.32	4.21	3.73
730	Secondary School	Married	40		1	0	0	0	24.974	103	63	0	75.6	5.38	0	0.66	7.94853	2.74	2.27	4.54	5.19
731	Junior High School	Married	42		1	0	0	0	26.5625	122	79	0	29	4.2	0	0.84	7.94209	3.23	2.31	4.17	4.81
732	High School	Married	49		0	0	1	0	25.4694	108	61	0	95	4.87	0	3.12	9.40228	2.61	2.5	4.07	4.28
733	High School	Married	48		1	0	0	0	27.9421	117	78	0	77	4.19	0	0.85	7.95154	2.6	2.27	3.85	4.52
734	Junior High School	Unmarried	49		0	0	0	1	21.3382	95	62	0	67	5.33	0	0.64	7.90842	2.5	2.27	3.93	4.29
735	High School	Married	48		1	0	0	0	24.3911	134	55	0	119	4.98	0	1.21	8.47741	2.5	2.43	4.11	3.88
737	High School	Married	48		1	0	0	0	28.3531	110	73	0	66.75	4.47	0	1.1	8.27406	3.01	2.34	4.13	4.98
738	Secondary School	Married	40		1	0	0	0	26.8923	134	84	0	54.51	4.31	0	1.21	8.33291	2.96	2.43	4.17	4.36
739	High School	Married	49		0	0	0	0	22.8329	99	65	0	77.33	6.32	0	2.77	9.54392	3.1	2.5	4.6	5.14
740	College	Married	42		0	0	0	1	23.4221	138	81	0	59	4.28	0	0.8	7.91217	2.64	2.17	4.28	4.12
741	College	Married	50		0	0	0	0	20.5761	125	66	0	61	4.65	0	0.99	8.20817	3.18	2.25	4.45	4.91
743	High School	Married	48		1	0	0	0	25.0657	123	71	0	73	4.49	0	1.01	8.19316	2.53	2.24	4.33	4.02
745	College	Married	47		0	0	0	0	23.3355	127	76	0	54	4.81	0	2.95	9.33386	3.15	2.25	3.89	5.12
746	High School	Married	48		1	0	0	0	26.986	105	68	0	95.1	4.44	0	1.82	8.77085	2.74	2.28	4.1	5.03
748	Secondary School	Married	42		1	0	0	0	23.0518	113	78	0	76	4.95	0	0.64	7.83446	3.23	2.36	4.34	4.92
750	College	Married	48		0	0	0	1	27.7447	138	85	0	75	5.05	0	1.1	8.39605	3	2.26	3.64	4.35
751	High School	Married	41		1	0	0	0	28.8889	122	71	0	95	5.02	0	1.4	8.63126	3.02	2.26	3.66	4.44
752	High School	Married	43		0	0	0	1	21.2306	110	57	0	50	5.01	0	0.51	7.61945	3.14	2.36	3.62	4.39
753	High School	Married	43		1	0	1	0	26.7698	113	64	0	37.8	4.69	0	0.38	7.2592	2.31	2.27	4.06	4.31
754	College	Married	46		1	0	0	0	26.2227	112	65	0	48.7	5.58	0	0.75	8.11286	2.81	2.2	4.14	4.84
755	Secondary School	Married	49		1	0	0	0	22.9398	97	50	0	70.3	5.6	0	0.78	8.15566	1.79	2.2	4.41	3.61
756	High School	Married	40		1	0	0	0	25.6312	117	72	0	116	4.65	0	0.96	8.1774	2.18	2.24	4.17	3.85
757	High School	Married	45		1	0	0	0	27.3438	116	61	0	84	5.34	0	0.96	8.31576	2.93	2.37	4.53	4.94
758	Secondary School	Married	49		1	0	0	0	31.8878	137	68	0	57.8	5.2	0	1.13	8.45223	2.33	2.03	4.19	3.86
760	High School	Married	48		0	0	0	1	20.4294	113	63	0	39.31	4	0	0.74	7.76655	2.12	2.39	3.86	4.52
761	College	Married	46		0	0	0	1	21.3839	132	88	0	48	5.01	0	1.37	8.6076	2.8	2.35	3.87	4.89
762	College	Married	44		1	0	0	0	26.5625	122	66	0	53.27	4.51	0	1.54	8.61944	2.73	2.4	4.13	4.71
763	College	Married	42		1	0	0	1	28.0863	111	75	0	49.58	5	0	1.12	8.40412	1.98	2.32	4.21	3.29
764	College	Married	43		0	0	0	0	20.83	109	70	0	49.6	4.36	0	0.44	7.33285	1.29	2.32	3.63	3.21
765	College	Married	45		0	0	0	0	24.5675	134	84	0	65.6	4.94	0	1.48	8.67076	2.25	2.22	3.84	4.09
766	College	Married	42		0	0	0	1	23.0518	104	54	0	60.9	5.01	0	0.85	8.13027	2.35	2.38	3.91	4.22
767	Undergraduate	Married	45		0	0	0	0	27.3438	131	82	0	95.98	4.56	0	1.13	8.3209	2.78	2.34	4.21	4.52
768	Secondary School	Married	57		0	0	1	1	23.8281	139	74	0	50.4	6.16	0	1.39	8.82874	2.3	2.29	3.48	4.26
769	High School	Married	43		0	0	0	0	21.3675	128	89	0	53.8	5.16	0	0.83	8.13596	2.44	2.42	4.01	4.57
775	College	Married	43		0	0	0	0	21.875	110	74	0	44	5.16	0	1.13	8.44451	2.24	2.4	3.91	3.87
780	College	Married	42		0	0	0	1	22.6003	91	52	0	50.4	5.07	0	1.76	8.87001	2.79	2.32	4.22	5.03
781	High School	Married	51		0	0	0	1	24.3827	130	80	0	65.5	4.54	0	1.12	8.30761	2.84	2.43	3.82	4.65
784	College	Married	49		0	0	0	0	23.5556	117	73	0	50.02	4.95	0	0.98	8.26054	2.62	2.53	4.31	4.81
787	College	Married	43		0	0	0	0	21.0938	131	89	0	50.8	5.13	0	1.83	8.92078	2.54	2.37	4.14	4.57
788	College	Married	44		0	0	0	0	31.6404	99	71	0	61.76	4.73	0	1.28	8.48214	2.4	2.38	4.33	4.13
789	College	Married	49		0	0	0	0	22.4996	120	70	0	50.1	4.95	0	1.01	8.29069	2.36	2.31	4.1	4.34
790	High School	Married	49		0	0	0	1	22.3094	106	66	0	59.3	4.71	0	1.48	8.62309	2.87	2.54	4.1	5.04
791	College	Married	47		0	0	0	1	22.9591	116	79	0	45.1	4.96	0	1.13	8.40498	2.61	2.42	3.92	4.81
794	High School	Married	49		0	0	0	0	22.5069	103	65	0	45.3	4.23	0	0.85	7.96104	2.21	2.36	3.95	4.2
795	College	Married	48		0	0	0	0	26.5625	122	60	0	48.1	4.12	0	0.55	7.49937	2.67	2.33	3.99	4.81
798	College	Married	49		0	0	1	0	22.1453	134	86	0	87.3	4.5	0	1.57	8.63651	2.89	2.36	3.55	4.88
799	College	Married	40		1	0	1	1	25.2595	117	74	0	101.8	4.31	0	1.16	8.29071	3.24	2.41	4.03	5.17
801	College	Married	44		0	0	0	0	22.0317	113	70	0	45.7	4.49	0	0.73	7.8685	2.25	2.16	4.55	4.6
802	High School	Married	47		0	0	0	0	24.8889	111	71	0	55.7	5.17	0	1.72	8.86655	2.47	2.32	3.92	4.75
803	College	Married	48		0	0	0	0	21.2306	122	81	0	46.4	5.3	0	0.95	8.29777	2.41	2.42	3.85	4.71
805	College	Married	44		0	0	0	0	20.83	115	66	0	53.2	4.4	0	0.69	7.7919	2.38	2.34	3.74	4.62
808	College	Married	47		0	0	1	1	23.8281	118	78	0	37.5	4.33	0	0.93	8.07435	2.58	2.35	4.14	4.59
815	College	Married	48		0	0	0	1	24.1633	103	67	0	61	4.33	0	0.36	7.12527	2.2	2.22	3.5	3.42
816	College	Married	40		0	0	0	1	22.1003	118	71	0	42.6	4.81	0	1.32	8.52969	2.57	2.18	3.89	4.43
819	Undergraduate	Married	45		0	0	0	1	24.0882	117	63	0	37	4.78	0	1.14	8.37683	1.82	1.83	4.02	2.78
823	High School	Married	43		0	0	1	1	27.1731	139	88	0	54.3	5.47	0	1.37	8.69545	2.74	2.32	4	4.39
827	College	Married	51		0	0	1	1	26.4463	119	72	0	54	5.71	0	1.94	9.08626	2.85	2.21	3.72	4.47
828	College	Married	44		0	0	0	0	21.0938	113	58	0	35	4.53	0	0.64	7.74579	2.08	2.19	4.36	4.16
829	College	Married	52		0	0	1	1	26.1719	115	67	0	56.6	6.85	0	4.71	10.1553	2.41	2.45	3.67	4.79
831	College	Married	43		1	0	0	0	21.7193	133	88	0	59.2	5.14	0	1.22	8.51726	3.1	2.49	4.62	4.84
832	College	Married	46		0	0	0	0	23.4375	106	67	0	51.9	4.19	0	0.84	7.9397	2.47	1.99	3.66	3.97
833	College	Married	42		0	0	0	1	22.4913	105	60	0	67.8	4.67	0	1.15	8.36228	2.29	2.27	3.55	3.62
834	College	Married	43		0	0	0	1	24.6094	139	88	0	36.7	5.07	0	1.64	8.79939	2.1	2.16	3.6	3.58
835	Undergraduate	Married	43		0	0	0	0	20.4152	96	46	0	42.7	4.94	0	0.87	8.13946	2.72	2.15	3.8	5.14
836	College	Married	43		0	0	0	0	21.4844	130	78	0	62.4	5.34	0	0.79	8.12086	2.28	2.23	3.88	4.44
837	College	Married	42		0	0	0	1	20.4152	96	46	0	42.7	4.94	0	0.87	8.13946	2.72	2.15	3.8	5.14
839	College	Married	42		0	0	0	1	28.0843	128	85	0	55.7	5.28	0	1.38	8.66737	2.97	2.28	3.69	4.57
840	College	Married	43		0	0	0	0	22.0317	103	65	0	45	4.76	0	0.55	7.64377	2.7	2.22	3.68	4.92
843	College	Married	46		1	0	0	0	20.4491	100	68	0	56.9	5.44	0	0.81	8.16441	2.14	2.18	3.93	3.39
847	Secondary School	Married	46		0	0	0	1	22.0317	109	75	0	56	5.76	0	1.68	8.95109	3.15	2.18	4.12	5.04
849	College	Married	42		0	0	1	1	25.5922	126	89	0	77.96	4.9	0	1.24	8.4857	2.36	2.71	4.5	4.16
850	Junior High School	Married	44		1	0	0	1	24.1588	97	53	0	51	4.6	0	0.6	7.69659	1.77	2.36	3.89	3.65
852	Secondary School	Married	51		1	0	1	0	20.1771	122	89	0	92.51	4.3	0	0.55	7.54213	2.03	2.35	4.4	3.77
854	Junior High School	Married	53		0	0	0	1	26.1224	101	79	0	81	4.69	0	0.65	7.79601	2.05	2.26	4.37	4.13
858	High School	Married	42		1	0	1	1	22.921	124	81	0	59	4.2	0	1.27	8.35546	1.65	2.22	4.1	3.79
859	High School	Married	53		0	0	0	0	23.1834	94	57	0	96.66	5.27	0	2.24	9.14986	2.88	2.7	4.5	4.93
860	College	Married	43		0	0	0	0	19.5312	116	80	0	42.06	4.72	0	0.34	7.15436	2.68	2.52	3.67	4.74
861	High School	Married	44		0	0	1	1	25.4694	112	69	0	67.84	5.01	0	2.44	9.18479	2.77	2.66	4.41	4.71
862	College	Married	46		0	0	0	0	21.1927	118	62	0	45.37	4.43	0	1.54	8.60154	2.97	2.41	3.81	5.13
863	College	Married	44		0	0	0	1	26.8136	111	66	0	67.7	4.93	0	0.78	8.02823	1.99	2.51	4.61	3.54
864	College	Married	45		0	0	1	1	22.231	111	70	0	75	3.9	0	1.06	8.1006	1.72	2.09	3.89	3.57
865	College	Married	49		0	0	0	1	24.8358	132	78	0	63.95	4.69	0	1.37	8.5416	2.4	2.53	4.35	4.18
870	College	Married	43		0	0	1	1	21.2228	93	62	0	89.06	5.87	0	1.63	8.93979	2.81	2.69	4.36	4.92
871	High School	Married	50		0	0	0	1	24.4418	118	79	0	69.84	5.53	0	1.63	8.88012	2.3	2.71	5.23	4.53
872	High School	Married	47		0	0	0	1	20.5151	90	67	0	37.53	5.13	0	0.95	8.26517	2.71	2.57	4.29	4.9
873	Undergraduate	Married	50		0	0	1	1	25.6055	122	86	0	79	4.77	0	1.63	8.73228	2.48	2.14	3.53	4.03
874	Secondary School	Married	50		0	0	1	1	25.5593	126	88	0	43.85	4.54	0	1.91	8.84139	2.04	2.6	4.25	3.79
875	High School	Married	49		0	0	0	1	25.0574	117	84	0	73.82	4.97	0	3.65	9.5795	2.09	2.63	4.44	4.46
876	Junior High School	Married	43		0	0	0	1	21.2228	93	62	0	89.06	5.87	0	1.63	8.93979	2.81	2.69	4.36	4.92
878	College	Married	46		0	0	0	0	20.9572	117	73	0	52.84	4.8	0	0.61	7.75568	2.43	2.54	4.16	4.26
881	Secondary School	Married	45		1	0	0	0	21.2306	112	56	0	62.73	4.2	0	1.69	8.64117	2.5	2.34	4.1	4.3
883	High School	Married	43		0	0	0	0	23.7332	115	79	0	56.61	4.41	0	0.86	8.01441	2.85	2.23	4.2	4.91
884	College	Married	44		0	0	0	1	22.8329	112	79	0	66.75	5.11	0	1.36	8.62004	2.52	2.6	4.27	4.93
885	High School	Married	49		1	0	0	0	19.8141	106	74	0	64.87	4.8	0	0.53	7.61509	2.23	2.52	4.7	4.43
886	Secondary School	Married	47		1	0	0	0	19.5312	104	69	0	59.11	4.69	0	0.69	7.85573	1.98	2.64	4.69	4.51
887	College	Married	44		0	0	0	1	24.6755	135	86	0	76.67	4.74	0	2.91	9.30555	2.12	2.43	4.12	4.38
891	Secondary School	Married	49		1	0	0	0	28.3447	109	66	0	50.5	5.31	0	4.31	9.81189	2.43	2.28	3.68	4.85
893	Secondary School	Married	42		1	0	0	1	23.8751	113	57	0	72.3	5.1	0	1.44	8.67524	2.82	2.34	4.65	5.16
894	Undergraduate	Married	40		1	0	0	0	23.5078	97	60	0	59.62	4.65	0	1.17	8.37523	3.07	2.4	4.3	4.88
895	High School	Married	48		1	0	0	1	19.3337	108	59	0	46.3	4.97	0	0.56	7.70496	2.65	2.28	3.88	4.55
896	College	Married	49		0	0	0	1	24.974	106	50	0	71.7	4.97	0	1.88	8.91605	3	2.31	4.23	4.66
898	College	Married	49		0	0	0	0	22.6562	115	76	0	47.7	4.94	0	0.86	8.1279	2.56	2.37	4	4.86
900	High School	Married	49		0	0	1	1	20.3244	121	75	0	87.5	4.95	0	5.03	9.89616	1.98	2.18	3.89	4.44
901	High School	Married	49		1	0	1	0	23.8281	133	82	0	57.03	5.57	0	1.42	8.74941	2.88	2.36	4.47	5.06
903	College	Married	49		0	0	0	0	28.257	128	79	0	77.47	6.64	0	2.45	9.47056	2.35	2.69	4.48	4.31
905	High School	Married	46		0	0	1	0	24.6097	121	84	0	87	6.89	0	1.43	8.9691	2.83	2.27	4.15	4.34
906	High School	Married	45		1	0	0	0	27.5482	132	83	0	84.6	6.04	0	0.87	8.3405	2.6	2.19	3.91	4.17
908	Secondary School	Married	51		1	0	1	1	23.3377	102	55	0	69.2	5.2	0	0.77	8.06865	2.95	2.16	3.74	4.9
910	Secondary School	Married	49		0	0	0	0	19.2894	122	76	0	64.7	4.75	0	0.85	8.07698	2.65	2.27	3.75	4.67
911	College	Married	42		0	0	0	1	26.5625	108	79	0	39.2	4.55	0	0.74	7.89538	2.13	2.19	3.68	4.56
913	Secondary School	Married	45		0	0	1	0	25.3069	120	75	0	53.5	5.68	0	3.51	9.67392	3.08	2.19	4	4.94
914	High School	Married	43		0	0	1	1	24.2215	127	89	0	102.3	4.59	0	1.38	8.52732	2.32	2.3	3.93	3.9
915	College	Married	43		0	0	0	0	21.7784	112	68	0	26	4.79	0	0.59	7.72025	2.14	2.21	3.86	4.32
916	College	Married	46		0	0	0	1	21.875	110	64	0	40.4	4.82	0	0.64	7.80784	2.87	2.12	3.7	4.78
917	College	Married	41		0	0	0	0	20.5693	125	79	0	55	4.54	0	1.01	8.20423	2.19	2.22	3.75	4.43
918	Secondary School	Unmarried	49		1	0	0	0	26.3465	107	67	0	43.8	4.83	0	1.24	8.47131	2.91	2.18	3.52	4.86
919	Secondary School	Married	46		0	0	0	0	21.1927	111	67	0	34.7	4.67	0	0.56	7.6427	3	2.26	3.82	4.97
920	Secondary School	Married	49		0	0	0	0	25.6312	119	75	0	49.5	4.64	0	0.94	8.1542	2.89	2.23	3.98	4.64
921	College	Married	46		0	0	0	0	29.3848	127	79	0	52.5	4.92	0	1.13	8.39688	2.85	2.25	3.99	4.68
922	College	Married	47		0	0	0	0	22.3133	138	72	0	45.1	4.44	0	1.03	8.20157	2.99	2.39	3.91	4.93
923	College	Married	49		0	0	0	0	19.9219	115	67	0	42.1	5.05	0	1.23	8.50776	1.5	2.26	4.73	3.39
924	High School	Married	42		0	0	0	1	19.5556	103	70	0	46.1	4.32	0	1.03	8.17417	2.66	2.38	3.83	4.55
925	College	Married	43		0	0	0	0	23.4375	108	62	0	65.5	5.2	0	0.67	7.92954	1.89	2.26	4.3	4.3
926	College	Married	48		0	0	0	1	26.1427	119	79	0	53.2	5.26	0	1.27	8.5805	2.83	2.2	3.86	4.65
928	Secondary School	Married	51		0	0	0	1	26.5338	139	71	0	72.7	4.84	0	2.85	9.30559	2.85	2.24	4.01	4.62
930	Secondary School	Married	43		1	0	1	1	30.7958	107	58	0	60	4.42	0	1.06	8.22577	2.75	2.22	3.59	4.74
931	Secondary School	Married	47		0	0	0	0	20.7008	90	60	0	44.1	5.42	0	0.92	8.28807	2.78	2.13	3.85	4.8
932	College	Married	45		0	0	1	1	23.9995	124	87	0	65.1	5.46	0	1.45	8.75037	2.51	2.53	3.93	4.33
933	Secondary School	Married	47		1	0	0	0	17.7154	139	66	0	47.2	4	0	0.7	7.71098	2.54	2.15	3.73	4.45
934	High School	Married	47		1	0	0	0	27.968	125	73	0	44.9	5.1	0	0.83	8.12427	2.9	2.32	4.31	4.59
937	High School	Married	46		0	0	0	0	27.2392	132	78	0	63.7	4.21	0	1.6	8.58882	2.41	2.09	3.67	4.07
938	College	Married	47		0	0	0	1	23.0469	123	78	0	71.3	5.9	0	1.34	8.74898	2.81	2.4	3.96	4.61
940	High School	Married	47		1	0	0	0	23.4375	107	62	0	48.7	4.53	0	1.14	8.32311	3.01	2.27	3.98	5.18
942	College	Married	45		0	0	0	1	21.5645	103	65	0	42.9	4.55	0	0.75	7.9088	2.69	2.24	3.93	4.68
943	Secondary School	Married	47		0	0	0	1	28.6501	139	84	0	56	5.29	0	1.07	8.41483	3.11	2.12	4.04	4.9
947	College	Married	44		1	0	0	0	20.1956	129	89	0	52.5	4.88	0	0.43	7.42253	2.1	2.14	4.11	3.86
948	College	Married	41		1	0	1	1	21.0938	102	64	0	59.5	4.52	0	3.04	9.30173	2.69	2.31	4.08	5.12
949	College	Married	48		0	0	0	1	31.25	113	78	0	30.3	6.4	0	1.55	8.97591	2.24	2.34	4.1	4.38
950	College	Married	43		0	0	0	0	24.4646	91	61	0	71.8	5.67	0	0.96	8.37572	2.84	2.33	4.61	4.84
951	High School	Married	45		0	0	1	1	22.6562	94	68	0	34.3	4.69	0	1.03	8.25635	3.1	2.37	4.18	5.06
952	High School	Married	47		0	0	0	1	27.2392	132	78	0	63.7	4.21	0	1.6	8.58882	2.41	2.09	3.67	4.07
954	College	Married	49		0	0	0	1	31.856	127	74	0	63.4	4.35	0	3.06	9.26995	2.98	2.35	3.79	4.15
956	High School	Married	47		1	0	0	0	20.0288	127	78	0	57.4	5.25	0	0.91	8.24527	2.76	2.4	3.9	4.58
957	College	Married	47		0	0	0	1	22.6562	136	77	0	45	4.65	0	1.28	8.46508	2.92	2.33	4.03	4.61
958	High School	Married	46		0	0	0	0	22.0386	120	73	0	54	4.65	0	1.07	8.28588	3.05	2.25	3.95	5.14
962	High School	Married	47		0	0	0	0	23.0469	136	88	0	52.7	5.08	0	1.63	8.79525	3.09	2.21	3.6	5.03
965	College	Married	43		0	0	0	0	22.0604	96	65	0	50	4.5	0	0.45	7.38693	1.96	2.19	3.67	4.42
966	College	Married	44		0	0	0	0	22.0386	114	68	0	39.6	4.72	0	0.73	7.91845	2.62	2.15	3.78	4.59
967	Secondary School	Married	45		0	0	1	1	20.7031	113	72	0	28.6	4.41	0	0.64	7.71894	2.82	2.12	3.79	4.89
969	High School	Married	45		1	0	0	0	24.6094	118	68	0	77.2	4.39	0	0.51	7.48734	2.5	2.37	4.13	5
972	College	Married	42		0	0	0	1	18.6709	94	60	0	43.4	4.62	0	1.31	8.48178	3.08	2.16	3.63	4.76
976	Junior High School	Married	51		1	0	1	1	21.5139	119	73	0	62.6	4.7	0	1.09	8.3151	1.42	2.19	3.74	2.63
978	College	Married	45		1	0	1	1	30.3673	127	87	0	69	6.62	0	1.72	9.11378	2.59	2.4	3.85	4.31
980	College	Married	48		0	0	1	0	26.6436	94	54	0	52.1	5.15	0	1.14	8.45138	2.98	2.4	4.39	4.72
983	College	Married	50		1	0	0	0	21.6311	113	83	0	33	4.42	0	1.35	8.4676	3.26	2.2	3.81	5.11
984	College	Married	45		0	0	0	0	25.3906	110	72	0	48.1	4.88	0	1.29	8.52114	2.9	2.28	3.66	4.82
988	College	Married	45		1	0	0	0	23.4375	101	69	0	53.1	4.79	0	0.82	8.04944	2.46	2.38	4.12	4.18
990	High School	Married	52		0	0	1	0	22.1003	106	61	0	46.3	4.48	0	0.43	7.33701	2.92	2.25	3.61	5.16
991	College	Married	42		0	0	1	1	22.5896	117	68	0	69.8	5.04	0	1.43	8.65644	2.6	2.17	3.93	4.18
992	High School	Married	42		1	0	0	0	43.1291	101	79	0	58.9	4.77	0	0.47	7.48868	1.69	2.11	3.78	3.1
993	College	Married	41		0	0	0	0	20.83	110	75	0	53	4.82	0	0.54	7.63794	2.98	2.17	3.93	4.79
994	High School	Married	44		0	0	0	1	25.1039	115	76	0	52.8	5.03	0	1.86	8.91735	2.64	2.21	4.18	4.57
995	College	Married	54		0	0	1	1	24.6094	110	73	0	52.7	4.77	0	1.12	8.35703	2.71	2.28	3.88	4.42
996	College	Married	42		0	0	0	0	22.0317	115	74	0	65.1	5.22	0	1.01	8.3438	2.91	2.4	4.39	4.61
997	College	Married	47		0	0	0	1	27.4506	127	89	0	37.4	4.69	0	1.03	8.25635	2.94	2.32	3.61	4.94
998	Junior High School	Married	43		1	0	1	0	25.7778	110	70	0	65.3	4.64	0	1.08	8.29303	2.17	2.3	4.24	4.15
999	High School	Married	47		0	0	0	0	19.8141	111	77	0	47	4.48	0	0.75	7.8933	2.02	2.29	3.78	4.2
1002	High School	Married	48		0	0	0	1	20.1348	120	83	0	47.1	3.94	0	1.14	8.18357	2.76	2.35	4.01	4.24
1004	College	Married	41		1	0	0	0	25.9107	108	66	0	76.5	4.31	0	0.67	7.74182	2.86	2.06	3.75	5
1005	High School	Married	47		1	0	0	0	21.048	121	75	0	66.6	4.54	0	0.87	8.05502	3.08	2.3	4.17	5.08
1007	Secondary School	Married	58		1	0	1	1	26.2976	130	85	0	72.9	5.12	0	1.77	8.88549	2.66	2.24	2.82	4.41
1008	College	Married	49		0	0	0	0	22.6562	99	50	0	50.3	5.01	0	1.22	8.49164	2.84	2.35	4.07	4.95
1009	Secondary School	Married	49		0	0	0	1	26.5625	109	73	0	56.4	4.52	0	0.39	7.24826	1.76	2.3	4.07	3.81
1010	High School	Married	48		1	0	0	1	25.3906	122	73	0	51.1	4.55	0	0.94	8.13461	2.44	2.35	4.01	4.13
1011	College	Married	47		0	0	0	0	25.3515	113	75	0	56.7	4.39	0	1.16	8.30911	3.27	2.26	3.82	4.82
1012	College	Married	44		1	0	0	0	24.0346	90	58	0	60.4	4.81	0	0.51	7.57871	2.65	2.25	4.21	4.77
1013	College	Married	40		0	0	0	0	22.5827	125	70	0	45.7	5.08	0	0.58	7.76194	2.56	2.16	3.84	4.37
1014	Undergraduate	Married	40		0	0	0	0	19.487	102	64	0	36.46	4.88	0	0.69	7.89544	2.47	2.32	3.95	4.6
1017	Secondary School	Married	56		0	0	1	1	20.2812	117	79	0	114.3	4.81	0	1.64	8.74675	2.78	2.3	4.23	4.16
1019	Secondary School	Married	42		1	0	0	0	24.093	105	62	0	65.64	4.49	0	0.85	8.02069	3	2.31	4.28	4.69
1022	Secondary School	Married	43		0	0	1	1	27.0416	126	81	0	78.93	5.26	0	2.29	9.17004	3.04	2.36	4.39	4.88
1025	High School	Married	46		0	0	1	1	21.6333	130	80	0	42.6	4.66	0	1.09	8.30655	2.32	2.36	4.39	4.41
1026	Secondary School	Married	47		0	0	0	0	21.875	111	66	0	44.8	4.61	0	0.69	7.83852	2.43	2.31	4.63	4.84
1027	Secondary School	Married	48		1	0	0	0	24	105	68	0	67.6	4.17	0	0.54	7.49309	2.3	2.19	4.12	3.87
1028	High School	Married	48		0	0	0	0	31.5537	117	73	0	70.5	5.44	0	0.98	8.35493	2.77	2.33	3.49	4.55
1029	High School	Married	53		0	0	0	0	24.9108	131	88	0	79.4	5.21	0	3.23	9.50442	2.22	2.33	4.21	4.12
1032	College	Married	47		1	0	0	0	21.7193	118	60	0	38.43	4.61	0	0.62	7.73155	1.93	2.33	4.21	4.05
1036	High School	Married	56		1	0	1	1	23.3067	111	75	0	90.4	4.54	0	1.67	8.70711	2.84	2.28	4.01	4.72
1038	High School	Married	41		0	0	0	0	23.0518	125	78	0	46.5	5.22	0	0.59	7.80622	2.38	2.23	3.32	4.37
1043	High School	Married	57		0	0	0	0	25.4327	120	83	0	85.16	5.91	0	1.21	8.64862	2.94	2.53	3.65	4.8
1045	College	Married	45		0	0	0	0	23.9361	111	64	0	48.78	4.69	0	0.86	8.07597	2.34	2.34	3.68	3.79
1046	College	Married	44		1	0	0	1	29.7521	119	80	0	79.41	4.98	0	2.38	9.15389	3.25	2.5	4.3	5.12
1047	College	Married	43		0	0	0	1	23.8281	112	67	0	50.93	4.55	0	1.75	8.7561	2.66	2.51	4.27	4.42
1050	College	Married	45		0	0	0	1	23.6652	120	68	0	51	4.99	0	0.74	7.98769	1.97	2.11	4.16	3.49
1052	College	Married	50		1	0	0	0	28.0404	133	78	0	99.78	5.68	0	1.77	8.98929	2.56	2.71	4.26	4.21
1053	College	Married	42		0	0	0	0	20.3125	107	81	0	35.26	5.01	0	0.86	8.14197	2.7	2.55	4.36	4.59
1055	High School	Married	48		0	0	0	0	26.1427	113	72	0	69.12	4.8	0	3.46	9.49124	2.45	2.28	3.94	4.33
1057	College	Married	45		0	0	0	1	23.7228	119	84	0	72.1	4.37	0	1.2	8.33844	2.36	2.55	4.33	3.92
1059	College	Married	49		0	0	0	0	20.3125	116	76	0	61.34	4.84	0	0.55	7.66043	2.84	2.62	4.09	4.59
1060	College	Married	59		0	0	1	1	25.9107	118	74	0	82.95	4.96	0	0.92	8.19938	2.96	2.36	4.05	4.3
1063	College	Married	44		0	0	1	0	26.2346	117	78	0	104	5.21	0	1.03	8.3615	3.1	2.17	4.26	4.84
1066	College	Unmarried	48		0	0	1	1	23.8751	108	76	0	74	4.48	0	1.25	8.40412	2.99	2.22	4.03	4.85
1068	Secondary School	Married	45		0	0	1	0	27.102	117	71	0	60	5.25	0	0.67	7.93911	2.25	2.22	3.98	3.76
1071	College	Married	42		0	0	0	1	21.83	106	78	0	52	4.95	0	1.79	8.86296	2.72	2.19	3.96	4.91
1073	Junior High School	Married	48		1	0	0	0	24.3865	139	88	0	56	4.49	0	0.79	7.94749	2.82	2.11	3.75	5
1074	College	Married	41		0	0	1	1	24.8358	114	61	0	48.8	4.43	0	0.76	7.89532	1.91	2.37	5.7	3.83
1079	High School	Married	52		0	0	1	1	26.3656	127	86	0	108.26	4.92	0	2.07	9.00221	3.04	2.5	4.46	4.68
1080	College	Married	48		0	0	0	1	24.3418	121	88	0	66	5.35	0	1.15	8.49821	3	2.26	4.22	4.88
1083	College	Married	49		0	0	0	0	24.3046	115	74	0	80.7	4.77	0	1	8.2437	2.37	2.37	3.77	4.34
1085	Secondary School	Married	47		0	0	0	0	24.6559	132	83	0	66.9	4.8	0	0.75	7.96229	2.6	2.31	4.74	4.47
1089	College	Married	43		0	0	0	0	24.4352	128	70	0	54.3	4.86	0	2.1	9.00433	3.32	2.27	4.26	5.18
1093	Undergraduate	Married	52		0	0	0	1	25.1559	107	69	0	81.5	5.11	0	0.46	7.53603	1.9	2.32	3.98	3.52
1094	College	Married	49		0	0	0	0	22.9854	112	53	0	57	5.29	0	0.77	8.08581	2.78	2.28	4.3	4.47
1098	College	Married	42		0	0	0	0	27.6888	119	61	0	78	5.27	0	1.85	8.95857	2.15	2.28	4.09	4.09
1099	College	Married	44		0	0	0	1	23.5883	108	67	0	61	4.5	0	0.99	8.17538	2.57	2.28	4.03	4.23
1100	College	Married	44		0	0	0	0	25.3906	121	78	0	46.5	4.7	0	0.69	7.85786	2.1	2.36	3.82	3.88
1104	College	Married	46		0	0	0	1	22.3435	104	69	0	62.8	4.94	0	0.66	7.86321	2.47	2.19	3.6	4.02
1111	Secondary School	Married	42		0	0	1	1	24.7409	117	75	0	57.6	4.63	0	1.92	8.86624	2.83	2.47	3.92	4.58
1118	High School	Married	46		1	0	0	0	24.2188	116	76	0	81.6	4.67	0	0.99	8.21247	2.69	2.25	3.88	4.6
1119	College	Unmarried	47		0	0	0	0	28.125	124	67	0	86.2	4.54	0	3.29	9.38517	2.9	2.16	3.85	4.73
1123	College	Married	44		0	0	1	1	22.4088	105	75	0	56.9	4.73	0	1.04	8.2745	2.14	2.25	3.87	3.94
1127	Secondary School	Married	41		1	0	1	1	25.9259	112	79	0	74.7	4.82	0	1.37	8.56894	3.26	2.16	3.69	4.98
1130	College	Married	49		0	0	0	1	26.4381	135	74	0	96.6	5.05	0	2.08	9.03311	2.87	2.27	3.89	4.9
1135	College	Married	40		1	0	0	1	22.8329	108	77	0	55.6	4.72	0	0.55	7.63533	2.87	2.37	3.8	4.6
1136	College	Married	44		1	0	0	0	23.7118	110	59	0	86.1	4.57	0	0.38	7.23329	2.61	2.39	4.37	5.1
1137	College	Married	44		0	0	0	0	29.7609	125	53	0	50	4.67	0	0.43	7.37855	1.88	2.2	4	4.03
1139	College	Married	42		0	0	0	0	22.6474	125	74	0	66	4.43	0	0.66	7.75424	2	2.18	3.84	3.96
1140	Secondary School	Married	42		1	0	0	0	23.2434	120	72	0	119.4	4.63	0	1.75	8.77353	2.88	2.44	4.06	5.07
1141	College	Married	47		0	0	0	0	22.8329	107	72	0	38.5	4.71	0	0.78	7.98258	2.86	2.17	3.73	5.19
1143	High School	Married	49		0	0	1	1	22.9854	140	67	0	52.1	4.77	0	0.61	7.74941	2	2.13	3.55	4.26
1145	High School	Married	48		0	0	0	0	26.1719	139	80	0	97	5.52	0	2.45	9.28582	2.25	2.41	3.85	4.21
1148	College	Married	46		0	0	0	1	26.2227	107	71	0	96.4	4.41	0	2.35	9.01965	2.91	2.43	4.32	5.15
1156	High School	Married	45		0	0	0	0	20.5499	105	57	0	51	4.83	0	0.53	7.62132	2.7	2.06	3.82	4.51
1158	College	Married	41		0	0	1	1	26.5625	116	81	0	43.5	4.41	0	0.83	7.9789	2.56	2.12	3.69	4.27
1159	College	Married	44		1	0	0	0	24.977	108	69	0	51.8	4.8	0	1.26	8.48108	2.74	2.51	3.93	4.56
1160	College	Married	43		0	0	0	0	28.3987	118	76	0	67.5	5.08	0	1.29	8.56131	2.75	2.1	3.98	4.24
1162	College	Married	44		0	0	1	1	25.8876	102	58	0	49.3	4.94	0	1.01	8.28867	2.83	2.36	4.25	4.63
1163	Secondary School	Married	41		1	0	0	1	30.4688	119	76	0	102.1	4.76	0	1.65	8.74238	2.44	2.1	3.97	4.53
1164	College	Married	46		0	0	0	1	23.3844	122	58	0	32.2	6.52	0	1.94	9.21892	2.48	2.27	3.97	3.98
1167	College	Married	44		0	0	0	0	21.8724	102	67	0	88	4.98	0	0.88	8.15895	1.36	2.23	4.29	3.19
1168	College	Married	45		0	0	0	0	20.9321	122	88	0	51.6	4.22	0	1.01	8.13114	1.75	2.15	4.31	3.95
1171	College	Married	47		0	0	1	1	23.6713	130	83	0	67.3	5.26	0	2.91	9.40964	3.18	2.32	3.81	4.97
1172	High School	Married	48		0	0	0	0	20.8889	130	85	0	67.2	4.42	0	0.41	7.2759	2.48	2.38	3.59	4.61
1182	High School	Married	46		1	0	0	1	32.4886	135	83	0	68	5.47	0	2.33	9.2265	3.18	2.16	3.85	4.68
1184	Secondary School	Married	51		0	0	1	1	25.6055	126	86	0	82.5	4.66	0	1.5	8.62584	3.26	2.23	3.7	5.08
1185	College	Married	44		1	0	0	0	23.4375	139	89	0	66.3	5.05	0	1.68	8.81954	3.13	2.4	3.76	4.77
1186	College	Married	40		1	0	1	1	22.6562	115	54	0	74.3	4.78	0	1.32	8.52343	3.04	2.1	3.86	4.47
1188	College	Married	42		0	0	0	1	23.5102	123	82	0	64.2	4.82	0	0.87	8.11487	2.72	2.31	3.96	4.58
1189	High School	Married	49		1	0	0	1	22.68	108	77	0	56.7	4.49	0	1.06	8.24148	2.1	2.19	3.77	4.6
1192	College	Married	43		1	0	0	0	25.3155	95	60	0	50.8	4.74	0	0.59	7.70976	2.35	2.13	4.28	4.17
1195	College	Married	41		0	0	0	1	21.5139	98	60	0	40.9	5.17	0	0.39	7.38262	2.82	2.41	4.02	4.91
1196	College	Married	47		0	0	0	1	20.9572	114	73	0	50.1	5.01	0	0.85	8.13027	2.07	2.36	3.81	4.67
1199	College	Married	44		0	0	0	1	26.3465	118	67	0	57.7	5.04	0	1.76	8.86408	2.89	2.38	4.47	4.69
1201	College	Married	47		0	0	1	1	24.6755	137	89	0	59	4.77	0	1.84	8.85347	3.1	2.34	4.23	4.8
1202	College	Married	43		1	0	1	0	20.9573	115	70	0	60.7	4.44	0	1.07	8.23967	2.34	2.26	3.77	4.04
1203	College	Married	42		0	0	0	1	20.8117	120	84	0	46.9	5.41	0	0.57	7.80749	2.44	2.19	4.09	5.11
1204	High School	Married	53		0	0	0	0	28.089	127	89	0	64.8	5.02	0	0.92	8.2114	2.74	2.29	4.03	4.49
1206	Secondary School	Married	43		0	0	0	0	24.3865	128	68	0	52.5	4.79	0	0.79	8.01216	2.8	2.28	4.26	5.19
1207	College	Married	48		0	0	0	0	23.5294	85	58	0	41.1	4.09	0	0.75	7.80222	2.86	2.21	3.97	4.72
1208	College	Married	55		0	0	0	0	29.3524	127	84	0	63.1	5.13	0	1.06	8.37473	1.61	2.24	3.65	2.96
1212	College	Married	47		0	0	0	0	21.875	113	63	0	99.6	4.84	0	0.8	8.03513	2.98	2.34	4.03	4.64
1213	Secondary School	Married	47		0	0	0	1	19.5312	105	62	0	61	4.66	0	0.34	7.14156	1.78	2.45	4.48	3.77
1217	Secondary School	Married	48		1	0	0	0	24.6548	105	54	0	68.2	5.4	0	1.21	8.55838	2.59	2.19	3.77	4.32
1218	Secondary School	Married	41		0	0	0	0	32.8933	121	77	0	48	4.4	0	2.23	8.96496	2.17	2.27	3.88	4.52
1220	College	Married	45		0	0	0	0	23.1111	106	69	0	52.3	4.7	0	0.88	8.10109	2.21	2.29	3.85	4.05
1221	College	Married	48		0	0	0	0	25.5296	139	73	0	121.84	5.38	0	2.1	9.10598	2.87	2.47	3.97	5.06
1225	High School	Married	48		0	0	1	1	22.0386	139	89	0	87.8	4.66	0	1.04	8.25959	3.19	2.28	3.86	4.97
1226	High School	Married	49		0	0	0	0	21.0828	106	68	0	68.5	4.39	0	1.9	8.80254	2.43	2.25	3.71	5.19
1227	High School	Married	47		1	0	0	0	25.7812	108	66	0	41.11	4.73	0	1.76	8.8006	1.73	2.28	3.93	3.69
1230	Secondary School	Married	48		1	0	0	0	26.1719	122	73	0	54.2	4.5	0	1.14	8.31646	2.96	2.13	4.07	4.88
1231	Secondary School	Married	41		1	0	0	0	28	118	60	0	76.75	4.77	0	0.82	8.04525	2.26	2.24	4.41	3.94
1233	Secondary School	Married	44		0	0	0	1	22.4766	127	73	0	44.4	4.77	0	0.73	7.92899	2.21	2.34	3.96	3.81
1234	Undergraduate	Married	40		0	0	0	1	20.2812	132	87	0	34	4.61	0	0.76	7.93515	2.42	2.48	3.88	4.17
1236	High School	Married	45		0	0	0	0	18.75	113	59	0	41	4.71	0	0.94	8.16917	2.4	2.17	3.33	4.29
1241	College	Married	45		0	0	0	1	23.7118	106	71	0	47.19	4.55	0	0.61	7.70219	2.12	2.34	4.24	3.97
1242	College	Married	48		1	0	0	1	22.3863	131	86	0	79.45	5.38	0	1.67	8.87687	3.19	2.53	4.14	4.62
1243	College	Married	46		0	0	0	0	16.5889	119	69	0	42.9	4.24	0	0.69	7.75486	2.23	2.3	4.02	4.54
1248	High School	Married	48		0	0	0	1	24.8016	123	78	0	93.94	4.43	0	0.97	8.1393	2.74	2.36	3.74	4.14
1249	College	Married	43		0	0	0	0	20.4294	119	76	0	44.3	4.57	0	0.58	7.65614	2.51	2.19	3.81	4.5
1253	Secondary School	Married	42		0	0	0	1	22.4813	107	71	0	52.75	4.35	0	0.7	7.79486	2.39	2.33	4.27	4.45
1254	Secondary School	Married	45		1	0	0	0	29.7521	97	56	0	55.43	4.21	0	0.84	7.94447	2.51	2.42	4.28	4.15
1257	High School	Married	46		1	0	0	0	26.5625	120	67	0	66	4.73	0	1.43	8.59296	2.97	2.19	4	4.8
1260	Secondary School	Married	41		1	0	0	0	26.0375	107	66	0	46	4.72	0	0.74	7.93206	2.96	2.22	4.27	5.04
1262	Secondary School	Married	44		1	0	0	0	24.0238	133	77	0	50	4.79	0	0.68	7.86222	2.66	2.16	4.12	4.33
1263	High School	Married	46		0	0	0	1	20.9572	101	69	0	61	4.91	0	2.79	9.29867	3.19	2.19	4	5.05
1266	High School	Married	49		0	0	0	1	24.1672	112	75	0	31.3	5.04	0	0.53	7.66388	2.37	2.2	3.97	4
1267	High School	Married	47		0	0	1	1	28.4082	121	88	0	69.6	5.64	0	1.81	9.00457	3.05	2.33	4.16	4.73
1269	College	Married	47		0	0	1	1	20.83	109	63	0	53.5	5.13	0	0.59	7.78883	2.07	2.38	4.91	4.45
1270	Secondary School	Married	42		1	0	0	0	17.5781	107	76	0	48.44	4.69	0	0.68	7.84113	1.73	2.37	4.19	4.03
1272	Secondary School	Married	45		1	0	0	0	20.0288	127	84	0	79.2	4.1	0	0.39	7.15073	1.92	2.28	3.43	3.93
1274	High School	Married	43		0	0	0	1	20.9572	117	67	0	48.6	5.15	0	1.21	8.51097	3.07	2.39	4.01	4.83
1275	Secondary School	Married	41		1	0	0	1	23.3844	110	72	0	56.5	5.06	0	0.57	7.7406	1.81	2.38	4.09	3.45
1276	Secondary School	Married	41		1	0	0	0	21.83	112	66	0	39.1	5.35	0	0.54	7.74227	1.59	2.26	4.09	3.82
1277	Undergraduate	Married	42		1	0	0	0	27.9421	119	72	0	79.3	5.57	0	0.69	8.02769	2.56	2.41	5.9	4.57
1278	College	Married	48		0	0	0	0	23.7954	128	72	0	73.06	5.59	0	1.05	8.45113	2.63	2.4	4.42	5
1279	Secondary School	Married	42		1	0	0	0	23.4375	100	56	0	44.8	5.6	0	0.69	8.03306	2.63	2.2	4.15	4.57
1283	College	Married	40		0	0	0	0	22.7244	112	80	0	84.92	4.43	0	0.98	8.14955	2.05	2.26	4.28	3.69
1285	College	Married	52		0	0	0	1	18.902	102	60	0	62.62	4.4	0	1.32	8.44059	1.65	2.34	4.29	3.49
1286	College	Married	44		0	0	0	1	24.539	118	76	0	41.99	4.65	0	0.64	7.77194	2.31	2.24	3.57	4.12
1287	College	Married	44		0	0	0	1	19.2277	134	69	0	34.2	4.24	0	0.35	7.0761	2.58	2.18	4.07	4.98
1288	College	Married	49		0	0	0	0	24.7475	105	73	0	43.49	4.52	0	0.92	8.10649	2.58	2.57	4.01	4.69
1290	College	Married	44		0	0	1	1	22.2222	110	85	0	42.6	4.6	0	0.88	8.07958	2.3	2.4	4.51	3.99
1291	College	Married	55		0	0	0	1	22.9854	123	71	0	54.2	4.69	0	1.77	8.79777	2.38	2.27	4.97	3.89
1293	Secondary School	Married	49		1	0	1	1	28.4005	126	85	0	98	5.46	0	1.6	8.84881	2.88	2.36	4.3	4.32
1295	Undergraduate	Married	50		0	0	0	1	23.8751	120	72	0	35.5	5.37	0	1.5	8.76765	2.71	2.16	4.39	4.76
1297	College	Married	46		0	0	1	1	20.0851	126	76	0	100.7	5.61	0	1.32	8.68354	2.98	2.28	4.02	4.67
1305	College	Married	46		0	0	0	1	26.2976	130	80	0	88.5	4.75	0	1.4	8.57597	2.62	2.44	4.33	5
1306	College	Married	44		0	0	0	1	22.6562	115	66	0	45.5	5.76	0	1.67	8.94512	2.3	2.34	4.91	4.92
1307	Secondary School	Married	48		0	0	1	1	29.2969	110	76	0	64.2	5.5	0	1.11	8.49046	3.39	2.37	4.48	4.93
1308	Secondary School	Married	50		1	0	1	1	21.1327	101	62	0	78.3	5.23	0	0.8	8.11262	3.01	2.27	4.62	4.96
1309	College	Married	46		0	0	0	0	27.6817	130	75	0	122.6	5.55	0	1.99	9.08329	3.18	2.35	3.97	5.19
1312	College	Married	50		0	0	0	0	24.0055	129	82	0	44	4.81	0	0.7	7.89538	2.8	2.24	4.73	4.53
1314	College	Married	48		0	0	0	1	22.0932	114	74	0	69.9	5.28	0	1.17	8.50229	2.94	2.29	5.09	4.61
1315	High School	Married	46		1	0	0	0	24.0346	118	62	0	78	4.38	0	0.63	7.69637	2.78	2.26	4.69	4.54
1319	High School	Married	50		0	0	0	0	21.3675	130	85	0	58.9	5.49	0	1.6	8.85429	3	2.32	4.31	5.06
1322	Undergraduate	Married	48		1	0	0	0	21.9899	108	58	0	47.1	5.03	0	0.69	7.92571	1.73	2.16	4.06	3.83
1324	College	Married	46		0	0	0	1	27.7323	115	71	0	55.75	4.74	0	0.91	8.14308	3.27	2.49	4.23	5.03
1325	College	Married	47		0	0	1	1	26.3958	99	66	0	88	5.01	0	0.97	8.26233	2.35	2.27	3.9	4.1
1326	High School	Married	45		1	0	0	0	27.3438	115	83	0	87.2	5.39	0	0.76	8.09146	3.13	2.14	4.11	4.99
1328	Secondary School	Married	42		1	0	1	1	25.9516	117	82	0	48.9	4.73	0	1.68	8.75408	2.51	2.13	3.53	3.86
1329	Undergraduate	Married	47		0	0	1	1	21.7738	100	67	0	58.3	4.92	0	0.68	7.889	1.51	2.1	3.96	2.56
1330	College	Married	50		0	0	1	1	23.1834	132	83	0	61.3	5.62	0	0.53	7.77281	3	2.36	3.81	4.98
1331	Undergraduate	Married	47		1	0	0	0	19.1406	108	62	0	43.4	4.54	0	0.26	6.84721	2.2	2	3.58	4.63
1333	High School	Married	50		0	0	1	1	25.6055	116	78	0	36.6	5.22	0	0.59	7.80622	3.17	2.21	4.29	4.62
1338	High School	Married	49		1	0	0	0	28.3737	115	62	0	97.6	5.34	0	1.35	8.65669	2.58	2.35	4.97	4.33
1339	Secondary School	Married	49		0	0	1	1	20.148	96	57	0	66.9	6.21	0	0.41	7.61592	1.35	2.22	3.6	3.64
1340	High School	Married	46		0	0	0	0	23.7332	115	79	0	56.61	4.41	0	0.86	8.01441	2.85	2.23	4.2	4.91
1341	College	Married	45		0	0	0	1	24.2215	124	68	0	51.3	5.62	0	1.11	8.51205	2.43	2.4	4.32	4.46
1344	Secondary School	Married	43		1	0	0	0	25.1039	127	76	0	43.5	4.6	0	0.61	7.71312	2.93	2.45	4.04	4.85
1346	College	Unmarried	45		0	0	1	1	17.9592	100	62	0	91.65	4.23	0	1.16	8.27198	2.75	2.22	3.9	4.81
1347	College	Married	47		1	0	0	0	22.8374	126	76	0	60.9	4.27	0	0.85	7.97045	3.12	2.46	4.75	5.11
1348	High School	Married	45		0	0	1	1	23.5102	114	73	0	47.28	4.86	0	3.67	9.56259	2.42	2.51	4.42	4.58
1349	College	Married	48		0	0	1	1	25.3515	137	85	0	67.7	6.97	0	1.23	8.82999	2.89	2.3	3.58	4.59
1353	College	Married	44		1	0	1	1	28.0664	117	76	0	42.3	5.7	0	2.32	9.26339	3.25	2.34	3.83	4.78
1355	College	Married	47		0	0	0	0	20.5457	118	74	0	33	5.06	0	0.63	7.84069	2	2.16	3.71	4
1356	High School	Married	46		0	0	0	0	25.6369	129	85	0	44.4	5.06	0	0.87	8.16346	3.1	2.16	3.71	4.82
1365	Secondary School	Married	44		1	0	0	0	21.9363	97	67	0	66.67	4.94	0	1.42	8.62938	3.02	2.39	4.54	5.13
1368	Secondary School	Married	46		0	0	1	1	29.3962	107	76	0	89.3	5.54	0	1.58	8.85078	2.19	2.36	4.56	3.93
1369	College	Married	49		0	0	1	1	26.5118	121	78	0	68.3	4.51	0	1.7	8.71828	3.09	2.34	4.16	4.69
1371	College	Married	50		0	0	1	1	23.6203	135	84	0	65.7	5.68	0	1.71	8.9548	3.04	2.29	4.17	4.88
1375	Undergraduate	Married	44		1	0	0	0	29.1363	121	83	0	75.2	5.77	0	0.85	8.27151	2.18	2.19	4.1	4.2
1376	High School	Married	47		0	0	0	0	21.5019	127	80	0	57.7	5.32	0	1.06	8.4111	2.7	2.16	3.78	4.4
1377	Undergraduate	Married	48		1	0	0	0	25.4581	119	63	0	42.3	4.86	0	0.69	7.89133	2.99	2.29	4.24	4.57
1379	College	Married	44		1	0	0	0	22.2656	110	74	0	67	5.06	0	1.02	8.32253	2.9	2.22	3.89	4.92
1382	Secondary School	Married	42		1	0	0	0	20.9566	123	51	0	42	4.12	0	1.06	8.15548	2.68	2.08	3.78	4.5
1387	Secondary School	Married	43		0	0	0	1	20.4294	103	66	0	46.8	4.29	0	0.89	8.02111	1.99	2.27	3.94	3.38
1389	College	Married	48		0	0	1	1	24.8016	130	87	0	69.5	4.42	0	2.24	8.97397	3.27	2.39	3.83	4.99
1392	College	Married	42		0	0	0	1	22.2063	124	60	0	51.4	4.65	0	1.09	8.3044	2.4	2.44	4.5	4.15
1393	Undergraduate	Married	45		0	0	0	1	20.4152	84	41	0	53.1	4.92	0	1.49	8.67344	2.63	2.26	4.34	4.12
1395	College	Married	43		1	0	1	1	22.9926	129	79	0	124.4	5.41	0	1.36	8.67709	2.44	2.42	4.08	4.31
1396	High School	Married	43		1	0	1	1	29.3878	139	89	0	61.7	4.16	0	1.09	8.19305	3.38	2.27	4.22	5.07
1397	College	Married	51		0	0	0	0	26.1752	116	70	0	75.28	4.73	0	0.98	8.21508	1.91	2.39	3.6	3.54
1398	Undergraduate	Married	45		0	0	1	0	26.4915	125	85	0	44.94	4.91	0	0.91	8.17832	2.63	2.46	4.4	4.41
1399	Secondary School	Married	49		1	0	0	0	23.9361	135	75	0	94.49	4.51	0	0.88	8.05982	1.95	2.38	4.11	3.75
1400	College	Married	45		0	0	0	0	21.4619	122	73	0	49.82	4.57	0	0.74	7.89976	2.12	2.42	3.89	4.38
1401	College	Married	42		1	0	0	0	26.1224	101	71	0	64.07	4.49	0	1.06	8.24148	2.47	2.24	4.21	4.05
1402	College	Married	48		0	0	0	0	18.3594	123	76	0	66.73	4.33	0	0.45	7.34842	2.56	2.47	3.92	4.42
1403	College	Married	43		1	0	0	0	21.3333	100	55	0	123.34	4.51	0	0.92	8.10427	2.86	2.34	4.11	5.06
1404	Secondary School	Married	41		1	0	0	0	26.3465	130	73	0	73.39	5.62	0	1.6	8.87769	2.9	2.25	3.8	4.66
1406	Secondary School	Married	47		1	0	0	0	28.0277	110	65	0	54.87	4.77	0	0.74	7.9426	2.38	2.28	4.44	3.8
1408	Secondary School	Unmarried	46		0	0	1	0	22.8374	115	85	0	106.93	4.63	0	2.22	9.01142	3.18	2.37	4.29	5.09
